# Supplementary material
Source: PubMed Central journal article supplement (PMC4210294)
Supplement: pnas.1411199111.sapp.pdf [file pnas.1411199111.sapp.pdf]

# Supporting Information

## Supporting Data

Fig. S1

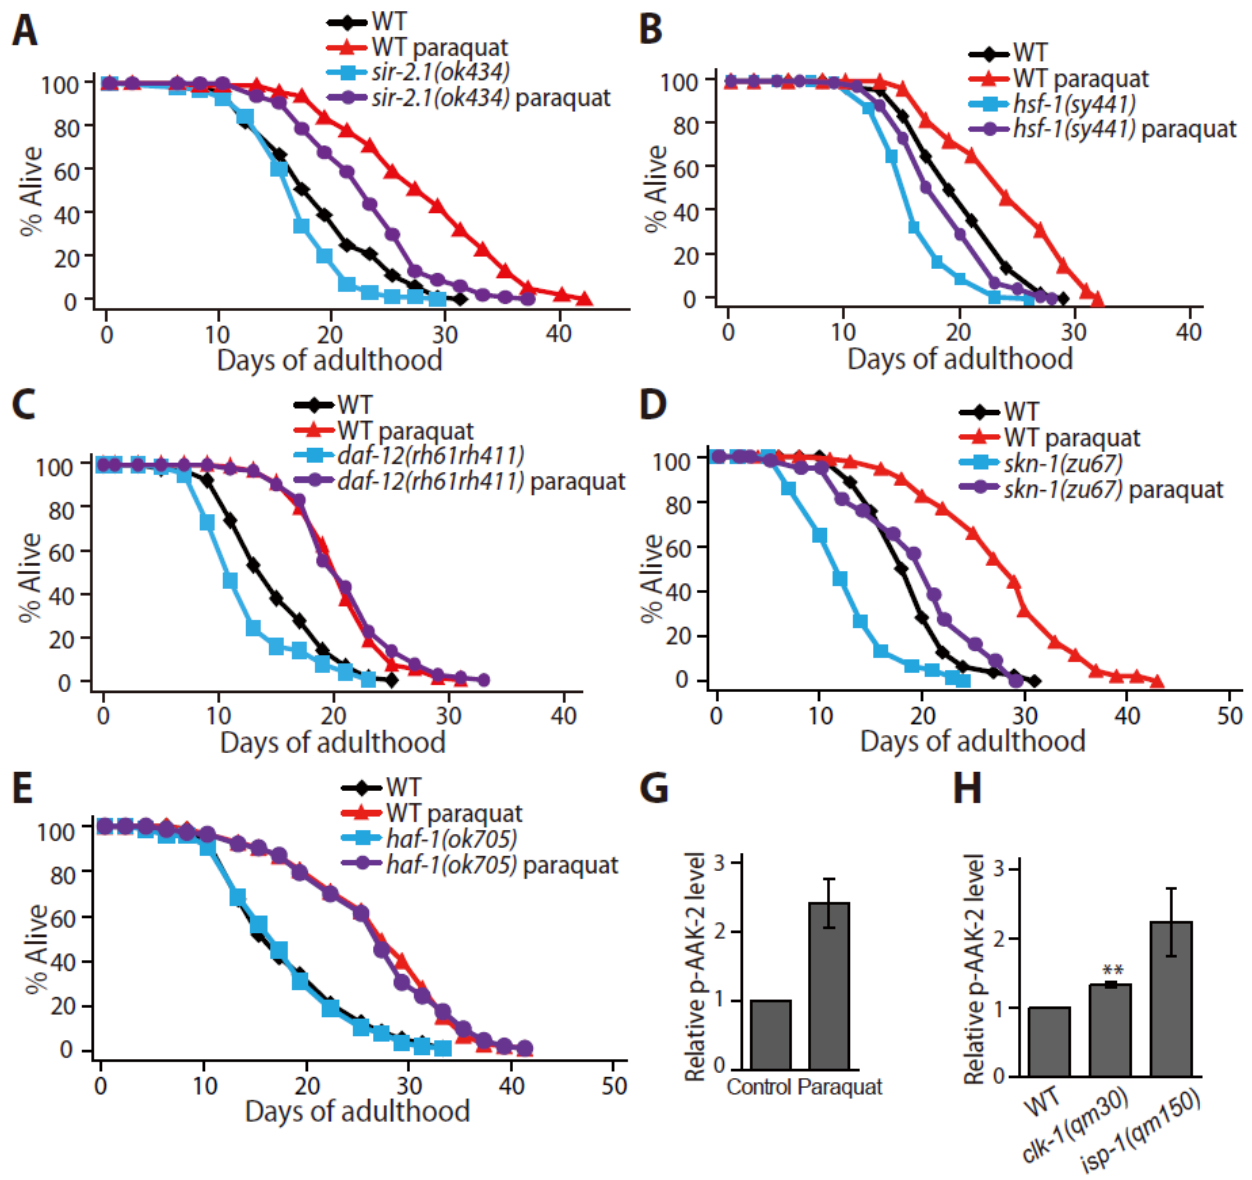

Fig. S1. The effect of paraquat (0.25 mM) treatment on the lifespan of various mutants defective in lifespan-regulatory genes. The longevity induced by 0.25 mM paraquat treatment

was not suppressed by mutations in NAD-dependent protein deacetylase/*sir-2.1(ok434)* (**A**), heat shock transcription factor 1/*hsf-1(sy441)* (**B**), nuclear receptor *daf-12(rh61rh411)* (**C**), NRF2-related transcription factor/*skn-1(zu67)* (**D**), or mitochondrial ABC transporter/*haf-1(ok705)* (**E**). The *hsf-1*- and *skn-1*-independent longevity caused by paraquat treatment is consistent with the observations in a previous study (1). See **Table S1** for statistical analysis and additional repeats. (**G-H**) The bar graphs are the quantification of the p-AAK-2 band intensity of Western blot data from **Figures 1G** (n=4, p=0.052) (**G**) and **1H** (n=3, p=0.062 for *isp-1* mutants) (**H**). Error bars represent SEM (\*\*p<0.01, Student's *t*-test).

**Fig. S2**

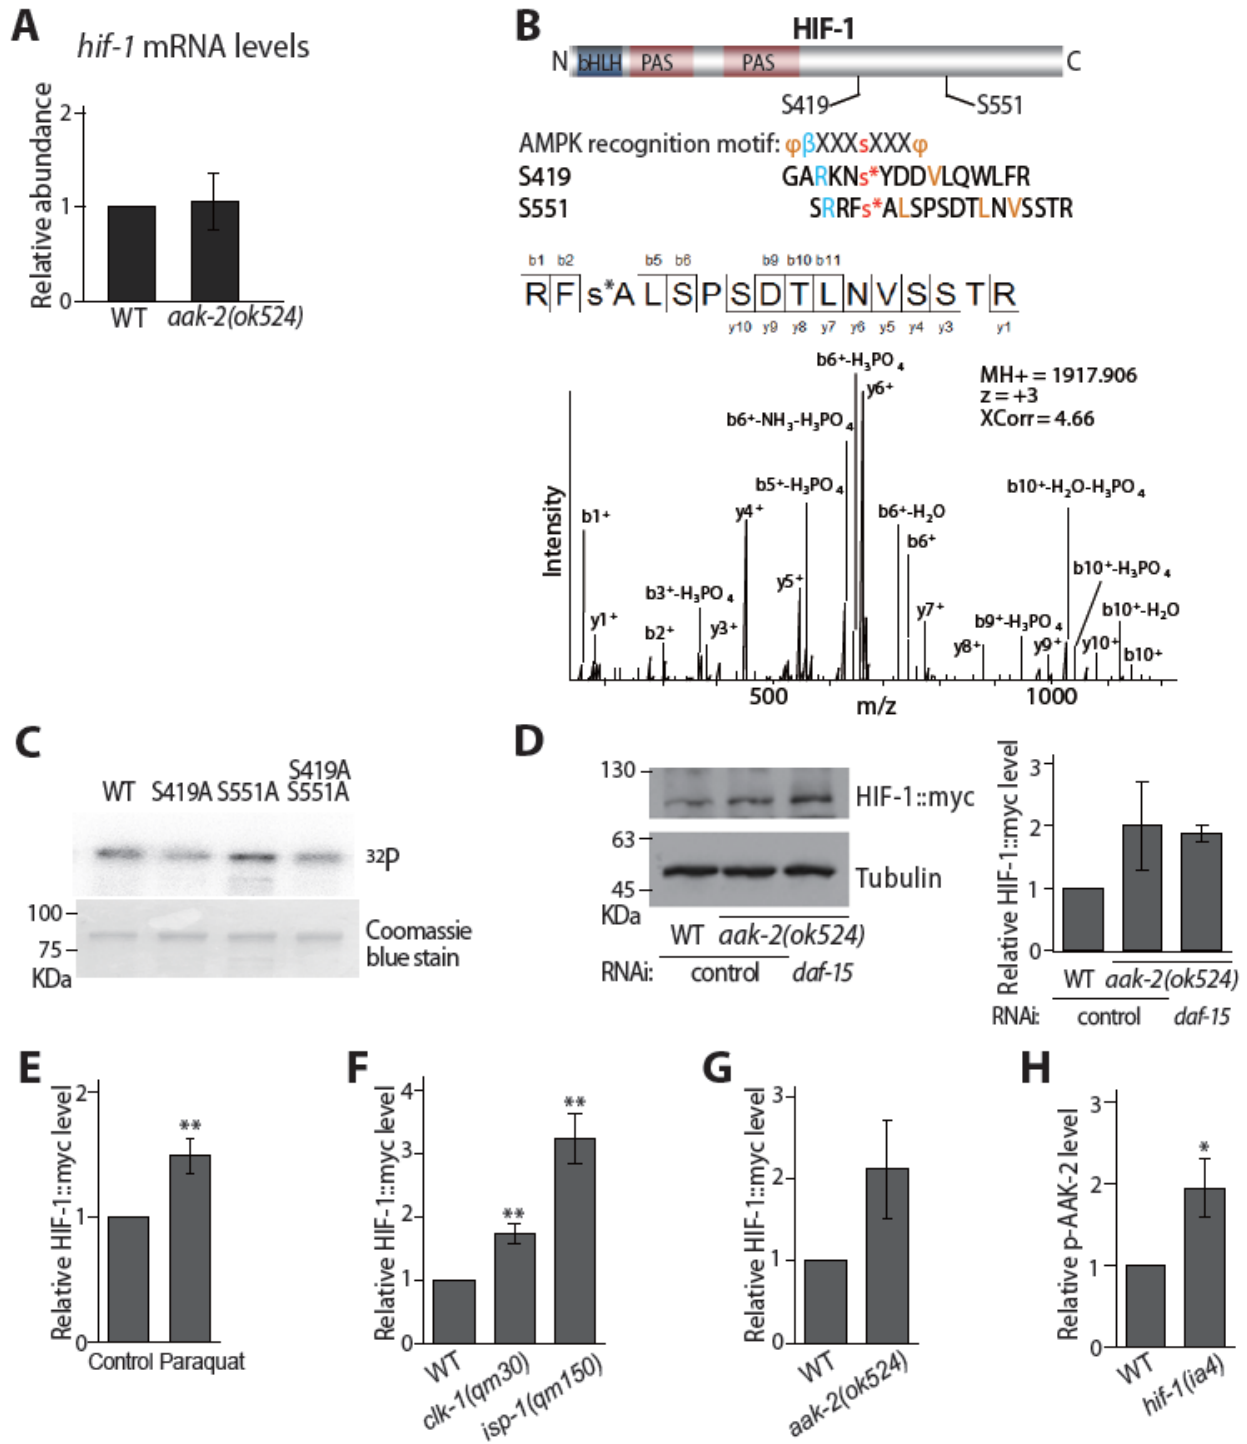

**Fig. S2. Regulation of HIF-1 by AAK-2 via phosphorylation.** (A) The mRNA levels of *hif-1*

measured by using quantitative reverse transcriptase-polymerase chain reaction (qRT-PCR) were not changed by *aak-2(ok524)* mutations (n=6). **(B)** MS/MS spectrum recorded using a Q Exactive mass spectrometer for the triply charged peptide RFs\*ALSPSDLNVSSTR (MH<sup>+</sup> = 1917.90635, z = +3, XCorr = 4.66). The peptide contains the S551 phosphorylation site. Daughter ions are annotated according to the nomenclature for peptide fragmentation in mass spectrometry. **(C)** In addition to S419 (**Figure 2E**), mass spectrometry analysis identified S551 as another potential phosphorylation site, which is modestly conserved with AMPK recognition motif. However, different from S419A mutation, S551A mutation did not reduce the level of phospho-GST-HIF-1C. The reduced phospho-HIF-1 level of S419A S551A mutant was similar to that of S419A. bHLH, basic helix-loop-helix domain; PAS, PER-ARNT-SIM domain; φ, hydrophobic residues; β, basic residues. Coomassie blue staining showed total protein load. **(D)** AMPK may down-regulate TOR (target of rapamycin), another key cellular energy sensor, which increases HIF-1 translation, as shown in mammalian cells (2, 3). However, knockdown of *daf-15/Raptor* did not influence the increased level of HIF-1::myc in *aak-2* mutants. The bar graph is the quantification data of the relative band intensity of HIF-1::myc levels normalized to tubulin (n=2). Transgenic animals expressing HIF-1::myc in wild-type or *aak-2* mutant background were treated with control or *daf-15* RNAi, which was retrieved from the Julie Ahringer *C. elegans* RNAi library, for 3 days with FUHR. α-tubulin was used as a loading control. **(E-H)** The quantification data of Western blot band intensity. The bar graph indicates relative HIF-1::myc levels from **Figures 2A** (n=5) **(E)**, **2B** (n=4) **(F)**, and **2C** (n=6, p=0.093) **(G)**, and the relative phospho-AAK-2 levels from **Figure 2H** (n=4) **(H)**. *aak-2* was not included in the genes whose expression levels were differentially regulated by hypoxia in previous microarray data (4). In another microarray analysis, the expression of *aak-2* was increased by 1.62 fold (n=1) in *vhl-1*

mutants (5). Further experiments are required in the future to determine whether HIF-1 affects AMPK directly or indirectly in various conditions. Error bars represent SEM (\* $p < 0.05$ , \*\* $p < 0.01$ , Student's  $t$ -test).

**Fig. S3**

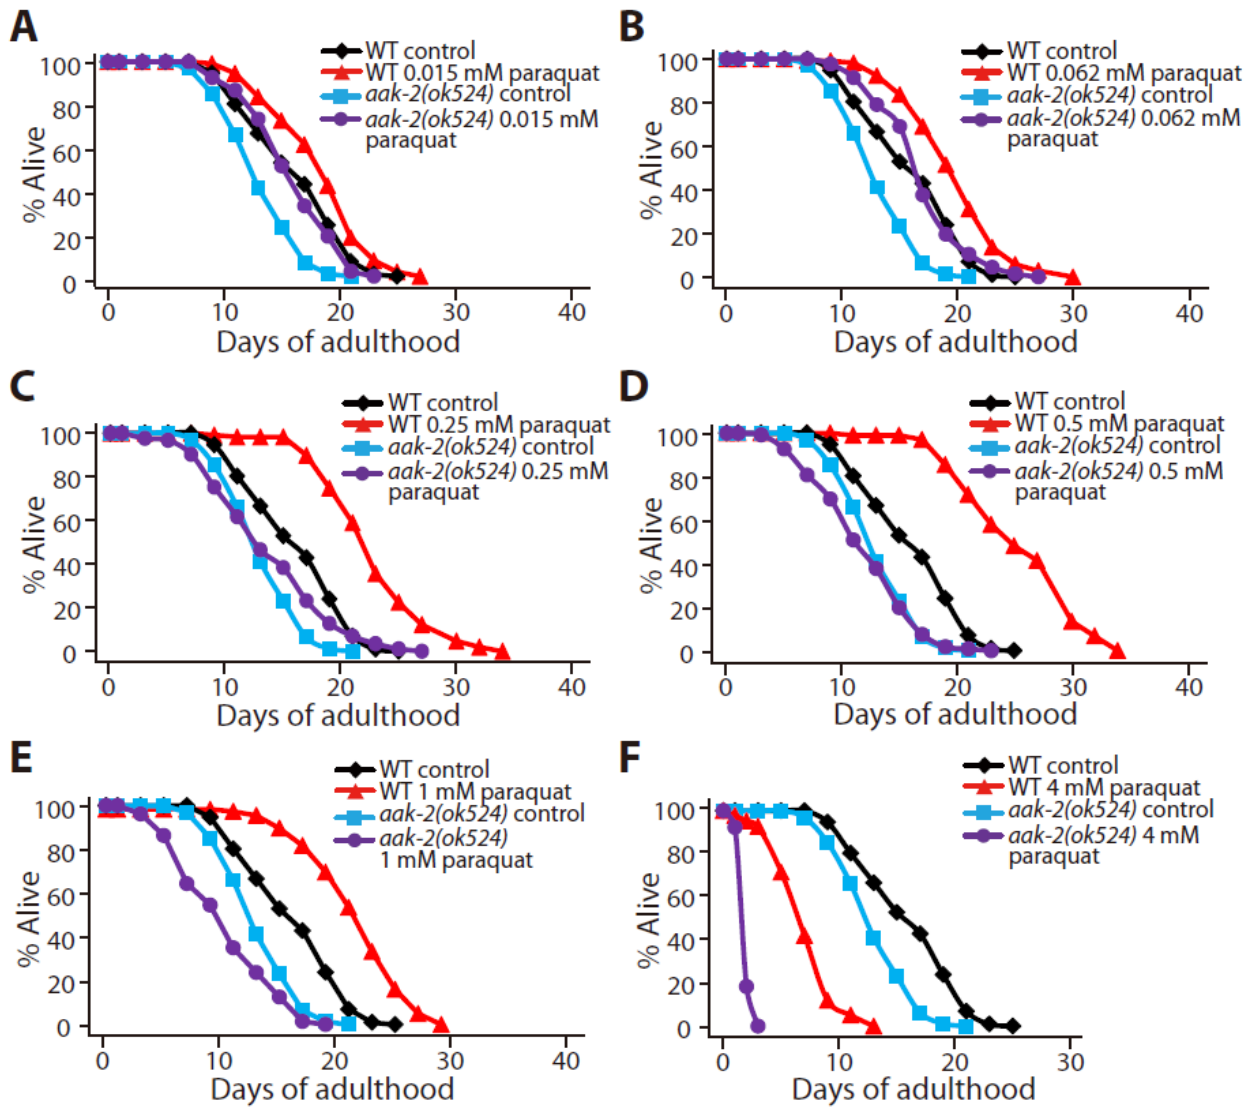

**Fig. S3. The lifespan of *aak-2* mutants treated with various doses of paraquat.**

Representative lifespan curves of wild-type and *aak-2(ok524)* animals with or without various concentrations of paraquat, 0.015 mM (A), 0.062 mM (B), 0.25 mM (C), 0.5 mM (D), 1 mM (E), and 4 mM (F) during adulthood. Yang and Hekimi reported that 0.1 mM paraquat treatment increased the lifespan of *aak-2* mutants (1), which, at first glance, appears different from our results. However, these data are actually consistent with one another because we showed that

*aak-2* mutants lived longer at lower concentrations of paraquat (**A** and **B**) while not surviving long at the higher concentrations (**C** or **D**) that increased wild-type lifespan. Curtis et al. reported that the *aak-2* mutations partially suppress longevity in *clk-1* and *isp-1* mutants (6). Because we found that *aak-2* mutations further increased ROS levels in *isp-1* mutants (**Figure 3F**), we speculate that *aak-2* mutations increase internal ROS levels in the respiration mutants to a toxic level that decreases longevity. However, two recent reports showed that AMPK is required for the generation of ROS in *C. elegans* (7, 8), which seems to conflict with our data. One noticeable difference was that the other two reports showed that *aak-2* mutations decreased ROS levels in animals with reduced insulin/IGF-1 signaling (IIS). Thus, the role of AMPK in ROS regulation is different in animals with reduced IIS compared to that in animals that have defective mitochondrial respiration. Interestingly, the longevity of IIS mutants is associated with an up-regulation of genes that detoxify ROS (9-11), whereas the increased lifespan of mitochondrial respiration mutants is linked to increased ROS levels (1, 12). Because reduced IIS and elevated mitochondrial ROS lengthen lifespan at least partially through AMPK (6, 13; this study), it is likely that AMPK contributes to the longevity of IIS and mitochondrial respiration mutants by balancing the levels of ROS in a context-dependent manner. See **Table S2** for statistical analysis and additional repeats.

**Fig. S4**

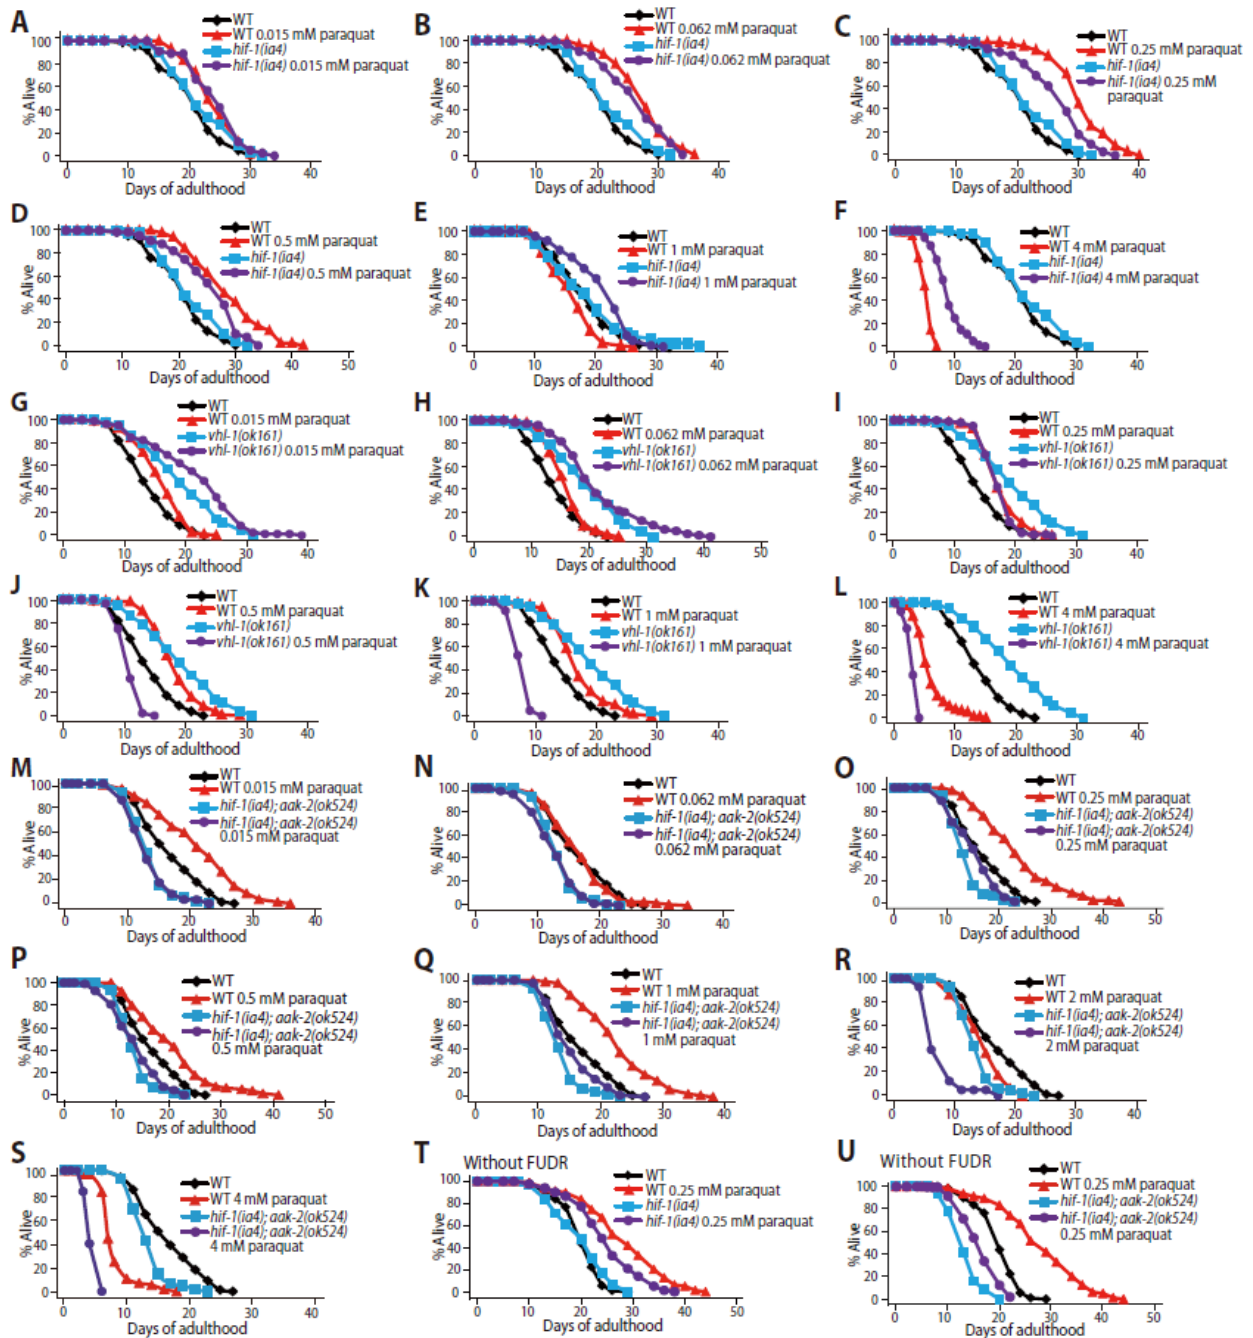

**Fig. S4. The lifespan of *hif-1*, *vhl-1*, and *hif-1; aak-2* mutants treated with various concentrations of paraquat. (A) Representative lifespan curves of wild-type and *hif-1(ia4)*, wild-type and *vhl-1(ok161)*, and wild-type and *hif-1(ia4); aak-2(ok524)* animals treated with**



0.015 mM (**A**, **G** and **M**), 0.062 mM (**B**, **H** and **N**), 0.25 mM (**C**, **I** and **O**), 0.5 mM (**D**, **J** and **P**), 1 mM (**E**, **K** and **Q**), 2 mM (**R**), and 4 mM (**F**, **L** and **S**) paraquat during adulthood as indicated. (**T- U**) Lifespan of *hif-1* and *hif-1; aak-2* mutants treated with paraquat (0.25 mM) was measured without FUDR. See **Table S3** for statistical analysis and additional repeats.

**Fig. S5**

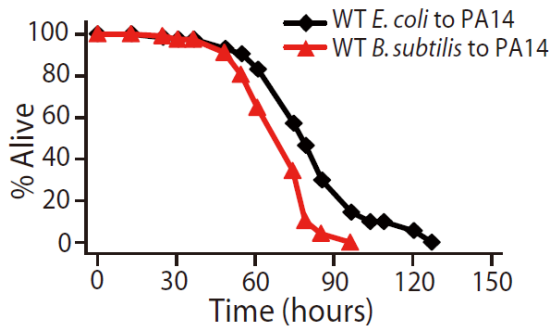

**Fig. S5. Preconditioning of non-pathogenic *Bacillus subtilis* decreases the survival of animals on *Pseudomonas aeruginosa*.** Wild-type animals transferred from *B. subtilis* to *P. aeruginosa* (PA14) at L4 to young adult stage displayed reduced resistance against PA14 compared to those transferred from OP50 *E. coli*. See **Table S5** for statistical analysis and additional repeats.

**Fig. S6**

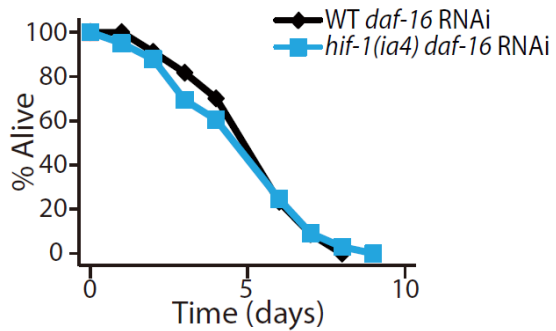

**Fig. S6. Survival analysis of wild type and *hif-1* mutant animals treated with *daf-16* RNAi on pathogenic *E. coli*.** RNAi targeting *daf-16* abolished the enhanced resistance against pathogenic *E. coli* in *hif-1* mutants at 25°C. This is consistent with the previous finding that *hif-1* mutants show a temperature-dependent longevity phenotype that requires DAF-16 (14), a well-known transcription factor that mediates longevity and pathogen resistance. See **Table S6** for statistical analysis and additional repeats.

## Supporting Tables

**Table S1. The effect of 0.25 mM paraquat treatment on the lifespan of *C. elegans*.**

| Strain/treatment              | Mean lifespan $\pm$ SEM (days) | 75th percentile | % change $^{\Delta}$               | Number of animals that died/total | p-value vs. control                     | Figure in text |
|-------------------------------|--------------------------------|-----------------|------------------------------------|-----------------------------------|-----------------------------------------|----------------|
| WT/control                    | 18.5 $\pm$ 0.4                 | 21              |                                    | 169/198                           |                                         | Fig. S1A       |
|                               | 18.7 $\pm$ 0.5                 | 23              |                                    | 118/151                           |                                         |                |
|                               | 18.2 $\pm$ 0.4                 | 23              |                                    | 125/162                           |                                         |                |
|                               | 18.1 $\pm$ 0.5                 | 23              |                                    | 121/150                           |                                         |                |
|                               | 18.3 $\pm$ 0.4                 | 22              |                                    | 140/162                           |                                         |                |
| WT/paraquat                   | 24.7 $\pm$ 0.5                 | 30              | +34%                               | 169/180                           | <0.0001                                 | Fig. S1A       |
|                               | 28.0 $\pm$ 0.6                 | 33              | +50%                               | 133/148                           | <0.0001                                 |                |
|                               | 21.3 $\pm$ 0.5                 | 26              | +17%                               | 97/162                            | <0.0001                                 |                |
|                               | 21.2 $\pm$ 0.5                 | 25              | +17%                               | 119/150                           | 0.0004                                  |                |
|                               | 26.2 $\pm$ 0.4                 | 30              | +43%                               | 129/162                           | <0.0001                                 |                |
| <i>aak-2(ok524)</i> /control  | 14.3 $\pm$ 0.2                 | 17              | -23%                               | 130/180                           | <0.0001                                 | Fig. 1A        |
|                               | 15.7 $\pm$ 0.3                 | 19              | -16%                               | 125/180                           | <0.0001                                 |                |
|                               | 13.2 $\pm$ 0.3                 | 15              | -27%                               | 114/162                           | <0.0001                                 |                |
|                               | 13.5 $\pm$ 0.3                 | 18              | -25%                               | 128/150                           | <0.0001                                 |                |
|                               | 14.2 $\pm$ 0.3                 | 17              | -22%                               | 145/162                           | <0.0001                                 |                |
| <i>aak-2(ok524)</i> /paraquat | 15.7 $\pm$ 0.2                 | 19              | +10%<br>(-15% <sup>WT ctrl</sup> ) | 165/182                           | <0.0001<br>(<0.0001 <sup>WT par</sup> ) |                |
|                               | 17.0 $\pm$ 0.3                 | 19              | +8%<br>(-9% <sup>WT ctrl</sup> )   | 124/150                           | 0.0007<br>(<0.0001 <sup>WT par</sup> )  |                |
|                               | 11.8 $\pm$ 0.2                 | 14              | -11%<br>(-35% <sup>WT ctrl</sup> ) | 121/162                           | 0.0001<br>(<0.0001 <sup>WT par</sup> )  |                |
|                               | 11.9 $\pm$ 0.3                 | 15              | -12%<br>(-34% <sup>WT ctrl</sup> ) | 124/150                           | 0.0015<br>(<0.0001 <sup>WT par</sup> )  |                |

|                                                  |          |    |                                    |         |                                         |                   |
|--------------------------------------------------|----------|----|------------------------------------|---------|-----------------------------------------|-------------------|
|                                                  | 13.3±0.4 | 17 | -6%<br>(-27% <sup>WT ctrl</sup> )  | 131/162 | 0.0997<br>(<0.0001 <sup>WT par</sup> )  | Fig. 1A           |
| <i>sir-2.1(ok434)</i><br>/control                | 18.3±0.4 | 21 | -1%                                | 119/162 | 0.2213                                  |                   |
|                                                  | 16.8±0.3 | 19 | -10%                               | 147/180 | 0.0001                                  | Fig. S1A          |
| <i>sir-2.1(ok434)</i><br>/paraquat               | 22.2±0.4 | 26 | +21%<br>(+20% <sup>WT ctrl</sup> ) | 162/185 | <0.0001<br>(<0.0001 <sup>WT par</sup> ) |                   |
|                                                  | 23.0±0.4 | 27 | +37%<br>(+23% <sup>WT ctrl</sup> ) | 141/153 | <0.0001<br>(<0.0001 <sup>WT par</sup> ) | Fig. S1A          |
| WT/control<br>without FUDR <sup>^</sup>          | 17.1±0.4 | 21 |                                    | 147/244 |                                         |                   |
| \$                                               | 14.2±0.4 | 17 |                                    | 59/125  |                                         |                   |
| *                                                | 20.2±0.4 | 24 |                                    | 108/175 |                                         | Fig. 1B, S4T, S4U |
| WT/paraquat<br>without FUDR <sup>^</sup>         | 21.1±0.4 | 25 | +23%                               | 118/180 | <0.0001                                 |                   |
| \$                                               | 23.1±0.6 | 27 | +63%                               | 105/180 | <0.0001                                 |                   |
| *                                                | 28.1±0.7 | 34 | +39%                               | 96/160  | <0.0001                                 | Fig. 1B, S4T, S4U |
| <i>aak-2(ok524)</i><br>/control<br>without FUDR  | 14.0±0.4 | 16 | -18%                               | 83/150  | <0.0001                                 |                   |
|                                                  | 12.7±0.4 | 15 | -10%                               | 72/150  | 0.0105                                  |                   |
|                                                  | 15.5±0.4 | 20 | -23%                               | 90/315  | <0.0001                                 | Fig. 1B           |
| <i>aak-2(ok524)</i><br>/paraquat<br>without FUDR | 13.9±0.3 | 16 | -1%<br>(-19% <sup>WT ctrl</sup> )  | 119/170 | 0.3417<br>(<0.0001 <sup>WT par</sup> )  |                   |
|                                                  | 13.2±0.2 | 15 | +4%<br>(-7% <sup>WT ctrl</sup> )   | 113/165 | 0.675<br>(<0.0001 <sup>WT par</sup> )   |                   |
|                                                  | 15.0±0.4 | 17 | -3%<br>(-26% <sup>WT ctrl</sup> )  | 96/207  | 0.2462<br>(<0.0001 <sup>WT par</sup> )  | Fig. 1B           |
| WT/control                                       | 19.9±0.5 | 25 |                                    | 121/147 |                                         | Fig. 1C           |
|                                                  | 16.4±0.5 | 20 |                                    | 126/150 |                                         |                   |
| WT/paraquat                                      | 26.0±0.5 | 31 | +31%                               | 130/153 | <0.0001                                 | Fig. 1C           |

|                                          |          |    |                                    |         |                                         |             |
|------------------------------------------|----------|----|------------------------------------|---------|-----------------------------------------|-------------|
|                                          | 30.6±0.6 | 36 | +87%                               | 137/150 | <0.0001                                 |             |
| <i>aak-2(rr48)</i><br>/control           | 15.5±0.3 | 17 | -22%                               | 100/150 | <0.0001                                 | Fig. 1C     |
|                                          | 13.3±0.3 | 17 | -19%                               | 115/150 | <0.0001                                 |             |
| <i>aak-2(rr48)</i><br>/paraquat          | 15.0±0.3 | 17 | -3%<br>(-25% <sup>WT ctrl</sup> )  | 118/148 | 0.5173<br>(<0.0001 <sup>WT par</sup> )  | Fig. 1C     |
|                                          | 15.7±0.5 | 20 | +18%<br>(-4% <sup>WT ctrl</sup> )  | 108/150 | <0.0001<br>(<0.0001 <sup>WT par</sup> ) |             |
| WT/control                               | 20.1±0.6 | 25 |                                    | 89/100  |                                         | Fig. 1D, 1E |
|                                          | 18.5±0.5 | 23 |                                    | 95/100  |                                         |             |
| WT/paraquat                              | 27.4±0.9 | 33 | +36%                               | 78/100  | <0.0001                                 | Fig. 1D, 1E |
|                                          | 22.2±0.6 | 27 | +20%                               | 91/100  | <0.0001                                 |             |
| <i>aakb-2(rr88)</i><br>/control          | 16.8±0.5 | 22 | -16%                               | 74/100  | <0.0001                                 | Fig. 1D     |
|                                          | 16.2±0.5 | 19 | -12%                               | 70/75   | 0.0006                                  |             |
| <i>aakb-2(rr88)</i><br>/paraquat         | 15.2±0.8 | 21 | -10%<br>(-24% <sup>WT ctrl</sup> ) | 57/120  | 0.1603<br>(<0.0001 <sup>WT par</sup> )  | Fig. 1D     |
|                                          | 15.5±0.5 | 19 | -4%<br>(-16% <sup>WT ctrl</sup> )  | 93/120  | 0.7463<br>(<0.0001 <sup>WT par</sup> )  |             |
| <i>par-4(tm2986)</i><br>/control         | 18.3±0.8 | 23 | -9%                                | 53/100  | 0.0136                                  | Fig. 1E     |
|                                          | 17.3±0.6 | 21 | -6%                                | 77/100  | 0.2001                                  |             |
| <i>par-4(tm2986)</i><br>/paraquat        | 21.4±0.7 | 25 | +17%<br>(+6% <sup>WT ctrl</sup> )  | 77/102  | 0.0053<br>(<0.0001 <sup>WT par</sup> )  | Fig. 1E     |
|                                          | 19.4±0.5 | 23 | +12%<br>(+5% <sup>WT ctrl</sup> )  | 78/100  | 0.0301<br>(<0.0001 <sup>WT par</sup> )  |             |
| Control transgenic (IJ599)<br>/control   | 19.5±0.6 | 23 |                                    | 108/150 |                                         | Fig. 1I, 1J |
|                                          | 18.9±0.5 | 24 |                                    | 134/150 |                                         |             |
| Control transgenic (IJ599)<br>/paraquat  | 26.3±0.7 | 31 | +35%                               | 92/150  | <0.0001                                 | Fig. 1I, 1J |
|                                          | 23.6±0.6 | 29 | +25%                               | 117/155 | <0.0001                                 |             |
| <i>CA-aak-2::gfp</i> (IJ600)<br>/control | 25.3±0.6 | 30 | +30%                               | 106/120 | <0.0001                                 | Fig. 1I, 1J |

|                                                             |          |    |                                           |         |                                            |                |
|-------------------------------------------------------------|----------|----|-------------------------------------------|---------|--------------------------------------------|----------------|
|                                                             | 25.4±0.4 | 28 | +34%                                      | 109/120 | <0.0001                                    |                |
| <i>CA-aak-2::gfp</i><br>(IJ600)<br>/paraquat                | 27.8±0.5 | 33 | +10%<br>(+43% <sup>Ctrl Tg</sup><br>ctrl) | 131/150 | 0.0008<br>(0.1852 <sup>Ctrl Tg par</sup> ) | Fig. 1I,<br>IJ |
|                                                             | 26.8±0.4 | 31 | +6%<br>(+42% <sup>Ctrl Tg</sup><br>ctrl)  | 140/155 | 0.0004<br>(0.0004 <sup>Ctrl Tg par</sup> ) |                |
| Control<br>transgenic<br>(WMB59 <sup>#</sup> )<br>/control  | 19.8±0.7 | 24 |                                           | 49/60   |                                            |                |
|                                                             | 20.1±0.5 | 23 |                                           | 74/90   |                                            |                |
| Control<br>transgenic<br>(WMB59 <sup>#</sup> )<br>/paraquat | 22.4±0.7 | 26 | +13%                                      | 74/90   | 0.0008                                     |                |
|                                                             | 23.5±0.7 | 29 | +17%                                      | 77/90   | 0.0002                                     |                |
| <i>CA-aak-2::gfp</i><br>(WMB60 <sup>#</sup> )<br>/control   | 23.3±0.4 | 26 | +18%                                      | 55/60   | 0.0003<br>(0.3602 <sup>Ctrl Tg par</sup> ) |                |
|                                                             | 23.4±0.4 | 26 | +16%                                      | 79/90   | 0.0017<br>(0.0497 <sup>Ctrl Tg par</sup> ) |                |
| <i>CA-aak-2::gfp</i><br>(WMB60 <sup>#</sup> )<br>/paraquat  | 22.8±0.6 | 26 | -2%<br>(+15% <sup>Ctrl Tg</sup><br>ctrl)  | 83/90   | 0.3009<br>(0.8885 <sup>Ctrl Tg par</sup> ) |                |
|                                                             | 22.7±0.5 | 25 | -3%<br>(+13% <sup>Ctrl Tg</sup><br>ctrl)  | 71/90   | 0.4750<br>(0.0527 <sup>Ctrl Tg par</sup> ) |                |
| WT/control                                                  | 20.4±0.4 | 24 |                                           | 130/162 |                                            | Fig.<br>S1B    |
|                                                             | 20.7±0.5 | 25 |                                           | 124/150 |                                            |                |
| WT/paraquat                                                 | 24.4±0.5 | 31 | +20%                                      | 114/162 | <0.0001                                    | Fig.<br>S1B    |
|                                                             | 27.6±0.5 | 31 | +33%                                      | 101/145 | <0.0001                                    |                |
| <i>hsf-1(sy441)</i><br>/control                             | 16.3±0.3 | 20 | -20%                                      | 129/162 | <0.0001                                    | Fig.<br>S1B    |
|                                                             | 16.6±0.3 | 20 | -20%                                      | 115/150 | <0.0001                                    |                |
| <i>hsf-1(sy441)</i><br>/paraquat                            | 18.9±0.4 | 25 | +16%<br>(-7% <sup>WT ctrl</sup> )         | 112/142 | <0.0001<br>(<0.0001 <sup>WT par</sup> )    | Fig.<br>S1B    |
|                                                             | 20.1±0.3 | 23 | +21%<br>(-3% <sup>WT ctrl</sup> )         | 115/150 | <0.0001<br>(<0.0001 <sup>WT par</sup> )    |                |
| WT/control                                                  | 14.3±0.3 | 17 |                                           | 104/121 |                                            |                |

|                                                    |          |    |                                     |         |                                         |          |
|----------------------------------------------------|----------|----|-------------------------------------|---------|-----------------------------------------|----------|
|                                                    | 15.1±0.4 | 19 |                                     | 106/120 |                                         | Fig. S1C |
| WT/paraquat                                        | 17.8±0.3 | 21 | +24%                                | 98/120  | <0.0001                                 |          |
|                                                    | 21.0±0.4 | 23 | +39%                                | 101/120 | <0.0001                                 | Fig. S1C |
| <i>daf-12</i><br>( <i>rh61rh411</i> )<br>/control  | 12.6±0.4 | 15 | -12%                                | 104/120 | 0.0020                                  |          |
|                                                    | 12.6±0.4 | 13 | -17%                                | 110/120 | <0.0001                                 | Fig. S1C |
| <i>daf-12</i><br>( <i>rh61rh411</i> )<br>/paraquat | 21.6±0.6 | 26 | +71%<br>(+51% <sup>WT ctrl</sup> )  | 102/125 | <0.0001<br>(<0.0001 <sup>WT par</sup> ) |          |
|                                                    | 21.3±0.4 | 23 | +69%<br>(+41% <sup>WT ctrl</sup> )  | 102/120 | <0.0001<br>(0.3896 <sup>WT par</sup> )  | Fig. S1C |
| WT/control                                         | 19.2±0.5 | 22 |                                     | 78/100  |                                         | Fig. S1D |
|                                                    | 19.5±0.5 | 22 |                                     | 83/100  |                                         |          |
| WT/paraquat                                        | 28.2±0.7 | 33 | +47%                                | 88/100  | <0.0001                                 | Fig. S1D |
|                                                    | 25.4±0.7 | 31 | +30%                                | 85/100  | <0.0001                                 |          |
| <i>skn-1</i> ( <i>zu67</i> )<br>/control           | 13.0±0.5 | 16 | -32%                                | 66/71   | <0.0001                                 | Fig. S1D |
|                                                    | 13.1±0.4 | 16 | -33%                                | 62/100  | <0.0001                                 |          |
| <i>skn-1</i> ( <i>zu67</i> )<br>/paraquat          | 19.8±0.8 | 25 | +52%<br>(+3% <sup>WT ctrl</sup> )   | 58/60   | <0.0001<br>(<0.0001 <sup>WT par</sup> ) | Fig. S1D |
|                                                    | 26.3±1.1 | 34 | +101%<br>(+35% <sup>WT ctrl</sup> ) | 59/62   | <0.0001<br>(0.1420 <sup>WT par</sup> )  |          |
| WT/control                                         | 18.1±0.5 | 22 |                                     | 135/150 |                                         | Fig. S1E |
|                                                    | 17.0±0.4 | 21 |                                     | 134/150 |                                         |          |
| WT/paraquat                                        | 26.8±0.7 | 33 | +48%                                | 113/150 | <0.0001                                 | Fig. S1E |
|                                                    | 28.5±0.6 | 33 | +68%                                | 111/150 | <0.0001                                 |          |
| <i>haf-1</i> ( <i>ok705</i> )<br>/control          | 17.7±0.5 | 22 | -2%                                 | 129/150 | 0.6852                                  | Fig. S1E |
|                                                    | 18.7±0.5 | 21 | +10%                                | 116/150 | 0.0085                                  |          |
| <i>haf-1</i> ( <i>ok705</i> )<br>/paraquat         | 26.4±0.7 | 31 | +49%<br>(+46% <sup>WT ctrl</sup> )  | 117/150 | <0.0001<br>(0.8613 <sup>WT par</sup> )  | Fig. S1E |
|                                                    | 28.0±0.7 | 33 | +50%<br>(+64% <sup>WT ctrl</sup> )  | 80/150  | <0.0001<br>(0.5128 <sup>WT par</sup> )  |          |



Within this table and other tables, the survival data sets shaded in the same colors (white or grey) were done in parallel within the solid line and statistical analysis was done within the data set. p-values were calculated using the log-rank (Mantel-Cox) method.

<sup>Δ</sup>: throughout **Tables S1-S6**, % change in survival was calculated against the same control data. Increased (+) or decreased (-) mean survival was indicated.

$\%^{WT\ ctrl}$  and  $\%^{Ctrl\ Tg\ ctrl}$ : the % change in mean lifespan compared to the control condition of wild-type or control-transgenic animals, respectively. The average of these percent values was used for the “% change in lifespan” in **Fig. 1F** or **Fig. 1J**.

p-values for single mutants were calculated against wild-type animals and for paraquat-treated mutants against control mutants. p-values in the parentheses ( $^{WT\ par}$  and  $^{Ctrl\ Tg\ par}$ ) are the p-values against wild-type and control transgenic animals treated with 0.25 mM paraquat, respectively.

<sup>^</sup>, <sup>\$</sup>, <sup>\*</sup>: the lifespan data marked with these are also used in **Table S3**.

<sup>#</sup>: We noticed that 0.25 mM paraquat treatment had only a small life-extending effect on the control transgenic animals (WBM59). We therefore performed four additional outcrosses for both control (co-injection marker only) and the *aak-2* transgenic animals. The newly outcrossed control animals (IJ599) significantly lived long upon 0.25 mM paraquat treatment (**Figures 1I and 1J**).

**Table S2. The effect of various doses of paraquat on the lifespan of *aak-2* mutants and *aak-2*-overexpressing transgenic animals.**

| Strain/treatment                     | Mean lifespan<br>±SEM<br>(days) | 75th<br>percen<br>tile | % change <sup>Δ</sup> | Number of<br>animals<br>that<br>died/total | p-value vs.<br>control | Figure<br>in text   |
|--------------------------------------|---------------------------------|------------------------|-----------------------|--------------------------------------------|------------------------|---------------------|
| WT/control <sup>@</sup>              | 14.1±0.4                        | 17                     |                       | 82/90                                      |                        |                     |
| <sup>@</sup>                         | 16.4±0.4                        | 19                     |                       | 106/120                                    |                        | Fig.<br>S3A-<br>S3F |
| WT/0.015 mM<br>paraquat <sup>@</sup> | 16.1±0.4                        | 19                     | +14%                  | 102/120                                    | 0.0019                 |                     |
| <sup>@</sup>                         | 18.6±0.4                        | 21                     | +13%                  | 97/120                                     | 0.0002                 | Fig.<br>S3A         |
| WT/0.062 mM<br>paraquat <sup>@</sup> | 16.1±0.4                        | 19                     | +14%                  | 54/60                                      | 0.0152                 |                     |
| <sup>@</sup>                         | 20.0±0.4                        | 23                     | +22%                  | 103/119                                    | <0.0001                | Fig.<br>S3B         |
| WT/0.25 mM<br>paraquat <sup>@</sup>  | 17.7±0.3                        | 19                     | +26%                  | 94/120                                     | <0.0001                |                     |
| <sup>@</sup>                         | 23.0±0.4                        | 25                     | +40%                  | 107/120                                    | <0.0001                | Fig.<br>S3C         |
| WT/0.5 mM<br>paraquat <sup>@</sup>   | 18.4±0.4                        | 21                     | +30%                  | 112/120                                    | <0.0001                |                     |
| <sup>@</sup>                         | 25.8±0.5                        | 30                     | +57%                  | 92/120                                     | <0.0001                | Fig.<br>S3D         |
| WT/1 mM<br>paraquat <sup>@</sup>     | 17.2±0.4                        | 19                     | +22%                  | 109/120                                    | <0.0001                |                     |
| <sup>@</sup>                         | 22.2±0.5                        | 25                     | +35%                  | 100/120                                    | <0.0001                | Fig.<br>S3E         |
| WT/4 mM<br>paraquat <sup>@</sup>     | 6.0±0.3                         | 7                      | -57%                  | 81/90                                      | <0.0001                |                     |
| <sup>@</sup>                         | 7.4±0.3                         | 9                      | -55%                  | 70/120                                     | <0.0001                | Fig. 3B,<br>S3F     |
| <i>aak-2(ok524)</i><br>/control      | 11.7±0.4                        | 15                     | -17%                  | 48/90                                      | 0.0002                 |                     |

|                                                |          |    |                                    |         |                                         |                 |
|------------------------------------------------|----------|----|------------------------------------|---------|-----------------------------------------|-----------------|
|                                                | 13.4±0.3 | 15 | -18%                               | 81/120  | <0.0001                                 | Fig. S3A-S3F    |
| <i>aak-2(ok524)</i><br>/0.015 mM<br>paraquat   | 12.4±0.5 | 15 | +6%<br>(-12% <sup>WT ctrl</sup> )  | 63/120  | 0.2002<br>(<0.0001<br>WT 0.015 mM par)  |                 |
|                                                | 16.2±0.5 | 19 | +21%<br>(-1% <sup>WT ctrl</sup> )  | 48/90   | <0.0001<br>(0.0001<br>WT 0.015 mM par)  | Fig. S3A        |
| <i>aak-2(ok524)</i><br>/0.062 mM<br>paraquat   | 13.9±0.4 | 17 | +19%<br>(-1% <sup>WT ctrl</sup> )  | 83/120  | 0.0001<br>(0.0015<br>WT 0.062 mM par)   |                 |
|                                                | 17.2±0.4 | 19 | +28%<br>(+5% <sup>WT ctrl</sup> )  | 69/120  | <0.0001<br>(<0.0001<br>WT 0.062 mM par) | Fig. S3B        |
| <i>aak-2(ok524)</i><br>/0.25 mM<br>paraquat    | 12.0±0.5 | 15 | +3%<br>(-15% <sup>WT ctrl</sup> )  | 71/90   | 0.4193<br>(<0.0001<br>WT 0.25 mM par)   |                 |
|                                                | 14.1±0.5 | 17 | +5%<br>(-14% <sup>WT ctrl</sup> )  | 90/120  | 0.0647<br>(<0.0001<br>WT 0.25 mM par)   | Fig. S3C        |
| <i>aak-2(ok524)</i><br>/0.5 mM paraquat        | 9.4±0.3  | 13 | -20%<br>(-33% <sup>WT ctrl</sup> ) | 108/120 | 0.0015<br>(<0.0001<br>WT 0.5 mM par)    |                 |
|                                                | 12.2±0.4 | 15 | -9%<br>(-26% <sup>WT ctrl</sup> )  | 107/120 | 0.2043<br>(<0.0001<br>WT 0.5 mM par)    | Fig. S3D        |
| <i>aak-2(ok524)</i><br>/1 mM<br>paraquat       | 8.7±0.4  | 11 | -26%<br>(-38% <sup>WT ctrl</sup> ) | 86/120  | <0.0001<br>(<0.0001<br>WT 1 mM par)     |                 |
|                                                | 10.5±0.5 | 13 | -22%<br>(-36% <sup>WT ctrl</sup> ) | 75/104  | <0.0001<br>(<0.0001<br>WT 1 mM par)     | Fig. S3E        |
| <i>aak-2(ok524)</i><br>/4 mM<br>paraquat       | 2.2±0.1  | 3  | -81%<br>(-84% <sup>WT ctrl</sup> ) | 48/90   | <0.0001<br>(<0.0001<br>WT 4 mM par)     |                 |
|                                                | 2.1±0.1  | 3  | -84%<br>(-87% <sup>WT ctrl</sup> ) | 47/90   | <0.0001<br>(<0.0001<br>WT 4 mM par)     | Fig. 3B,<br>S3F |
| Control transgenic<br>(IJ599)/4 mM<br>paraquat | 9.2±0.3  | 12 |                                    | 95/100  |                                         | Fig. 3C         |
|                                                | 13.5±0.5 | 18 |                                    | 89/100  |                                         |                 |
| <i>CA-aak-2::gfp</i>                           | 10.9±0.4 | 14 | +19%                               | 95/100  | 0.0001                                  | Fig. 3C         |

|                                                          |          |    |      |        |         |  |
|----------------------------------------------------------|----------|----|------|--------|---------|--|
| (IJ600)/4 mM paraquat                                    | 15.1±0.6 | 19 | +12% | 87/100 | 0.003   |  |
| Control transgenic (WBM59 <sup>#</sup> )/4 mM paraquat   | 3.9±0.1  | 5  |      | 53/60  |         |  |
|                                                          | 4.5±0.1  | 7  |      | 51/60  |         |  |
| <i>CA-aak-2::gfp</i> (WBM60 <sup>#</sup> )/4 mM paraquat | 5.7±0.2  | 7  | +46% | 57/60  | <0.0001 |  |
|                                                          | 6.9±0.2  | 9  | +53% | 59/60  | <0.0001 |  |

Within this table, paraquat treatment was started from L4 stage throughout adulthood.

<sup>Δ</sup>: throughout **Tables S2-S3**, % changes in lifespan were calculated against the same control data.

Increased (+) or decreased (-) mean lifespan was indicated.

%<sup>WT ctrl</sup>: the % change was calculated against the lifespan compared to wild-type control. The average of these percentages was used for the “% change in lifespan” in **Figure 3A**.

p-values for mutants were calculated against wild type, and for mutants or transgenic animals treated with paraquat against the mutants under control condition and control transgenic (Tg) animals, respectively. p-values in the parentheses were calculated against wild type treated with the indicated concentration of paraquat (par).

<sup>@</sup>: the lifespan data marked with this are also used in **Table S3**.

<sup>#</sup>: We noticed that the survival time of control transgenic animals (WBM59) were substantially short upon 4 mM paraquat treatment. We performed four additional outcrosses for both control (co-injection marker only) (IJ599) and the *aak-2* transgenic animals (IJ600) for **Figure 3C**.

**Table S3. The effect of various doses of paraquat treatment on the lifespan of *hif-1*, *vhl-1*, and *hif-1*; *aak-2* mutants.**

| Strain/treatment     | Mean lifespan $\pm$ SEM (days) | 75th percentile | % change <sup>Δ</sup> | Number of animals that died/total | p-value vs. control | Figure in text |
|----------------------|--------------------------------|-----------------|-----------------------|-----------------------------------|---------------------|----------------|
| WT/control           | 21.4 $\pm$ 0.6                 | 24              |                       | 72/83                             |                     | Fig. S4A-S4F   |
|                      | 20.6 $\pm$ 0.6                 | 23              |                       | 63/75                             |                     |                |
|                      | 22.7 $\pm$ 0.6                 | 26              |                       | 52/90                             |                     |                |
|                      | 18.2 $\pm$ 0.5                 | 21              |                       | 90/100                            |                     |                |
|                      | 16.7 $\pm$ 0.5                 | 18              |                       | 85/98                             |                     |                |
| WT/0.015 mM paraquat | 20.4 $\pm$ 0.5                 | 24              | -5%                   | 71/85                             | 0.3243              | Fig. S4A       |
|                      | 24.3 $\pm$ 0.5                 | 28              | +18%                  | 59/75                             | 0.0002              |                |
|                      | 23.6 $\pm$ 0.6                 | 28              | +4%                   | 55/90                             | 0.1621              |                |
|                      | 22.0 $\pm$ 0.8                 | 26              | +21%                  | 68/100                            | <0.0001             |                |
|                      | 21.2 $\pm$ 0.6                 | 26              | +27%                  | 75/100                            | <0.0001             |                |
| WT/0.062 mM paraquat | 23.3 $\pm$ 0.6                 | 26              | +9%                   | 77/86                             | 0.0137              | Fig. S4B       |
|                      | 27.7 $\pm$ 0.7                 | 30              | +34%                  | 44/73                             | <0.0001             |                |
|                      | 25.4 $\pm$ 0.7                 | 30              | +12%                  | 60/82                             | 0.0006              |                |
|                      | 23.4 $\pm$ 0.7                 | 26              | +29%                  | 73/100                            | <0.0001             |                |
|                      | 22.2 $\pm$ 0.6                 | 26              | +33%                  | 75/100                            | <0.0001             |                |
| WT/0.25 mM paraquat  | 26.8 $\pm$ 0.7                 | 32              | +25%                  | 63/87                             | <0.0001             | Fig. S4C       |
|                      | 30.6 $\pm$ 0.6                 | 34              | +49%                  | 58/75                             | <0.0001             |                |
|                      | 27.0 $\pm$ 0.7                 | 30              | +19%                  | 72/90                             | <0.0001             |                |
|                      | 24.4 $\pm$ 1.0                 | 30              | +34%                  | 66/100                            | <0.0001             |                |
|                      | 24.8 $\pm$ 0.8                 | 28              | +49%                  | 67/100                            | <0.0001             |                |
| WT/0.5 mM paraquat   | 23.9 $\pm$ 0.8                 | 28              | +12%                  | 71/87                             | 0.0009              |                |

|                                     |          |    |                                    |         |                                       |              |
|-------------------------------------|----------|----|------------------------------------|---------|---------------------------------------|--------------|
|                                     | 28.7±0.8 | 32 | +39%                               | 50/75   | <0.0001                               | Fig. S4D     |
|                                     | 22.1±0.7 | 28 | -3%                                | 76/90   | 0.4704                                |              |
|                                     | 19.0±0.6 | 24 | +4%                                | 90/100  | 0.2491                                |              |
|                                     | 21.2±0.6 | 26 | +27%                               | 74/100  | <0.0001                               |              |
| WT/1 mM paraquat                    | 19.2±0.6 | 22 | -10%                               | 78/80   | 0.0223                                |              |
|                                     | 22.3±0.7 | 25 | +8%                                | 64/75   | 0.1055                                | Fig. S4E     |
|                                     | 13.4±0.3 | 16 | -41%                               | 64/90   | <0.0001                               |              |
|                                     | 16.0±0.4 | 19 | -12%                               | 93/100  | 0.0003                                |              |
|                                     | 17.0±0.4 | 21 | +2%                                | 91/100  | 0.9697                                |              |
| WT/4 mM paraquat                    | 3.9±0.1  | 5  | -82%                               | 58/90   | <0.0001                               |              |
|                                     | 5.4±0.1  | 7  | -74%                               | 68/90   | <0.0001                               | Fig. S4F     |
|                                     | 6.5±0.2  | 8  | -71%                               | 73/90   | <0.0001                               |              |
|                                     | 6.9±0.1  | 8  | -62%                               | 80/90   | <0.0001                               |              |
|                                     | 7.7±0.2  | 9  | -54%                               | 103/135 | <0.0001                               |              |
| <i>hif-1(ia4)/control</i>           | 20.5±0.8 | 24 | -4%                                | 45/90   | 0.5797                                |              |
|                                     | 22.1±0.9 | 28 | +7%                                | 33/75   | 0.1683                                | Fig. S4A-S4F |
|                                     | 19.7±0.8 | 24 | -13%                               | 41/90   | 0.0107                                |              |
|                                     | 18.7±0.7 | 23 | +3%                                | 87/100  | 0.3922                                |              |
|                                     | 19.3±0.6 | 25 | +16%                               | 78/100  | 0.0007                                |              |
| <i>hif-1(ia4)/0.015 mM paraquat</i> | 23.4±0.7 | 26 | +14%<br>(+9% <sup>WT ctrl</sup> )  | 50/83   | 0.0215<br>(0.0002<br>WT 0.015 mM par) |              |
|                                     | 24.5±0.7 | 28 | +11%<br>(+19% <sup>WT ctrl</sup> ) | 41/75   | 0.0526<br>(0.4844<br>WT 0.015 mM par) | Fig. S4A     |
|                                     | 21.9±0.8 | 26 | +11%<br>(-4% <sup>WT ctrl</sup> )  | 53/90   | 0.0272<br>(0.2305<br>WT 0.015 mM par) |              |
|                                     | 22.3±1.0 | 29 | +19%<br>(23% <sup>WT ctrl</sup> )  | 60/100  | 0.0048<br>(0.5159<br>WT 0.015 mM par) |              |

|                                            |          |    |                                    |        |                                        |             |
|--------------------------------------------|----------|----|------------------------------------|--------|----------------------------------------|-------------|
|                                            | 20.4±0.6 | 25 | +6%<br>(+22% <sup>WT ctrl</sup> )  | 58/85  | 0.3043<br>(0.1409<br>WT 0.015 mM par)  |             |
| <i>hif-1(ia4)</i><br>/0.062 mM<br>paraquat | 22.2±0.7 | 26 | +8%<br>(+4% <sup>WT ctrl</sup> )   | 63/71  | 0.1556<br>(0.5092<br>WT 0.062 mM par)  | Fig.<br>S4B |
|                                            | 26.3±0.7 | 30 | +19%<br>(+28% <sup>WT ctrl</sup> ) | 58/75  | 0.0002<br>(0.2830<br>WT 0.062 mM par)  |             |
|                                            | 24.5±0.7 | 28 | +24%<br>(+8% <sup>WT ctrl</sup> )  | 51/90  | <0.0001<br>(0.2097<br>WT 0.062 mM par) |             |
|                                            | 21.5±0.6 | 25 | +15%<br>(+18% <sup>WT ctrl</sup> ) | 80/100 | 0.0203<br>(0.0073<br>WT 0.062 mM par)  |             |
|                                            | 20.8±0.4 | 22 | +8%<br>(+25% <sup>WT ctrl</sup> )  | 96/107 | 0.2024<br>(0.0039<br>WT 0.062 mM par)  |             |
| <i>hif-1(ia4)</i><br>/0.25 mM<br>paraquat  | 25.2±0.8 | 30 | +23%<br>(+18% <sup>WT ctrl</sup> ) | 64/73  | 0.0001<br>(0.2425<br>WT 0.25 mM par)   | Fig.<br>S4C |
|                                            | 26.5±0.7 | 30 | +20%<br>(+29% <sup>WT ctrl</sup> ) | 65/75  | 0.0001<br>(<0.0001<br>WT 0.25 mM par)  |             |
|                                            | 26.3±0.7 | 30 | +34%<br>(+16% <sup>WT ctrl</sup> ) | 79/90  | <0.0001<br>(0.5805<br>WT 0.25 mM par)  |             |
|                                            | 22.0±0.8 | 26 | +18%<br>(+21% <sup>WT ctrl</sup> ) | 76/100 | 0.0060<br>(0.0368<br>WT 0.25 mM par)   |             |
|                                            | 22.7±0.6 | 27 | +18%<br>(+36% <sup>WT ctrl</sup> ) | 65/98  | 0.0003<br>(0.0086<br>WT 0.25 mM par)   |             |
| <i>hif-1(ia4)</i><br>/0.5 mM paraquat      | 22.9±0.7 | 26 | +12%<br>(+7% <sup>WT ctrl</sup> )  | 75/87  | 0.0313<br>(0.1590<br>WT 0.5 mM par)    | Fig.<br>S4D |
|                                            | 25.6±0.7 | 30 | +16%<br>(+24% <sup>WT ctrl</sup> ) | 68/75  | 0.0008<br>(0.0028<br>WT 0.5 mM par)    |             |
|                                            | 22.2±0.7 | 26 | +13%<br>(-2% <sup>WT ctrl</sup> )  | 76/90  | 0.0124<br>(0.9014<br>WT 0.5 mM par)    |             |
|                                            | 21.2±0.6 | 25 | +13%<br>(+16% <sup>WT ctrl</sup> ) | 92/100 | 0.0353<br>(0.0170<br>WT 0.5 mM par)    |             |

|                                      |          |    |                                    |         |                                     |                     |
|--------------------------------------|----------|----|------------------------------------|---------|-------------------------------------|---------------------|
|                                      | 21.9±0.5 | 25 | +13%<br>(+31% <sup>WT ctrl</sup> ) | 91/100  | 0.0062<br>(0.4687<br>WT 0.5 mM par) |                     |
| <i>hif-1(ia4)</i><br>/1 mM paraquat  | 18.8±0.5 | 22 | -8%<br>(-12% <sup>WT ctrl</sup> )  | 65/75   | 0.0205<br>(0.6271<br>WT 1 mM par)   |                     |
|                                      | 22.5±0.4 | 25 | +2%<br>(+9% <sup>WT ctrl</sup> )   | 63/75   | 0.9482<br>(0.8792<br>WT 1 mM par)   | Fig.<br>S4E         |
|                                      | 16.5±0.5 | 18 | -16%<br>(-27% <sup>WT ctrl</sup> ) | 72/90   | <0.0001<br>(<0.0001<br>WT 1 mM par) |                     |
|                                      | 21.1±0.5 | 25 | +13%<br>(+16% <sup>WT ctrl</sup> ) | 93/100  | 0.0390<br>(<0.0001<br>WT 1 mM par)  |                     |
|                                      | 20.0±0.5 | 22 | +4%<br>(+20% <sup>WT ctrl</sup> )  | 86/100  | 0.6769<br>(<0.0001<br>WT 1 mM par)  |                     |
| <i>hif-1(ia4)</i><br>/4 mM paraquat  | 7.9±0.4  | 10 | -61%<br>(-63% <sup>WT ctrl</sup> ) | 86/90   | <0.0001<br>(<0.0001<br>WT 4 mM par) |                     |
|                                      | 9.1±0.3  | 10 | -59%<br>(-56% <sup>WT ctrl</sup> ) | 82/90   | <0.0001<br>(<0.0001<br>WT 4 mM par) | Fig.<br>S4F         |
|                                      | 11.2±0.3 | 13 | -43%<br>(-51% <sup>WT ctrl</sup> ) | 79/82   | <0.0001<br>(<0.0001<br>WT 4 mM par) |                     |
|                                      | 9.9±0.3  | 11 | -47%<br>(-45% <sup>WT ctrl</sup> ) | 85/90   | <0.0001<br>(<0.0001<br>WT 4 mM par) |                     |
|                                      | 9.6±0.2  | 11 | -50%<br>(-43% <sup>WT ctrl</sup> ) | 91/105  | <0.0001<br>(<0.0001<br>WT 4 mM par) |                     |
| WT/control <sup>@</sup>              | 14.1±0.4 | 17 |                                    | 82/90   |                                     | Fig.<br>S4G-<br>S4L |
| <sup>@</sup>                         | 16.4±0.4 | 19 |                                    | 106/120 |                                     |                     |
| WT/0.015 mM<br>paraquat <sup>@</sup> | 16.1±0.4 | 19 | +14%                               | 102/120 | 0.0019                              | Fig.<br>S4G         |
| <sup>@</sup>                         | 18.6±0.4 | 21 | +13%                               | 97/120  | 0.0002                              |                     |
| WT/0.062 mM<br>paraquat <sup>@</sup> | 16.1±0.4 | 19 | +14%                               | 54/60   | 0.0152                              | Fig.<br>S4H         |



|                                        |          |    |                                    |         |                                        |              |
|----------------------------------------|----------|----|------------------------------------|---------|----------------------------------------|--------------|
| @                                      | 20.0±0.4 | 23 | +22%                               | 103/119 | <0.0001                                |              |
| WT/0.25 mM paraquat@                   | 17.7±0.3 | 19 | +26%                               | 94/120  | <0.0001                                | Fig. S4I     |
| @                                      | 23.0±0.4 | 25 | +40%                               | 107/120 | <0.0001                                |              |
| WT/0.5 mM paraquat@                    | 18.4±0.4 | 21 | +30%                               | 112/120 | <0.0001                                | Fig. S4J     |
| @                                      | 25.8±0.5 | 30 | +57%                               | 92/120  | <0.0001                                |              |
| WT/1 mM paraquat@                      | 17.2±0.4 | 19 | +22%                               | 109/120 | <0.0001                                | Fig. S4K     |
| @                                      | 22.2±0.5 | 25 | +35%                               | 100/120 | <0.0001                                |              |
| WT/4 mM paraquat@                      | 6.0±0.3  | 7  | -57%                               | 81/90   | <0.0001                                | Fig. S4L     |
| @                                      | 7.4±0.3  | 9  | -55%                               | 70/120  | <0.0001                                |              |
| <i>vhl-1(ok161)</i> /control           | 19.4±0.7 | 25 | +38%                               | 74/90   | <0.0001                                | Fig. S4G-S4L |
|                                        | 22.2±0.6 | 27 | +35%                               | 92/120  | <0.0001                                |              |
| <i>vhl-1(ok161)</i> /0.015 mM paraquat | 21.8±0.8 | 26 | +12%<br>(+55% <sup>WT ctrl</sup> ) | 86/120  | 0.0088<br>(<0.0001<br>WT 0.015 mM par) | Fig. S4G     |
|                                        | 25.8±0.7 | 30 | +16%<br>(+57% <sup>WT ctrl</sup> ) | 78/90   | 0.0001<br>(<0.0001<br>WT 0.015 mM par) |              |
| <i>vhl-1(ok161)</i> /0.062 mM paraquat | 21.6±0.8 | 25 | +11%<br>(+53% <sup>WT ctrl</sup> ) | 82/120  | 0.0362<br>(<0.0001<br>WT 0.062 mM par) | Fig. S4H     |
|                                        | 24.5±0.6 | 30 | +10%<br>(+49% <sup>WT ctrl</sup> ) | 112/120 | 0.0035<br>(<0.0001<br>WT 0.062 mM par) |              |
| <i>vhl-1(ok161)</i> /0.25 mM paraquat  | 17.4±0.3 | 19 | -10%<br>(+23% <sup>WT ctrl</sup> ) | 89/120  | 0.0001<br>(0.3833<br>WT 0.25 mM par)   | Fig. S4I     |
|                                        | 21.7±0.4 | 25 | -2%<br>(+32% <sup>WT ctrl</sup> )  | 105/120 | 0.0783<br>(0.0325<br>WT 0.25 mM par)   |              |
| <i>vhl-1(ok161)</i> /0.5 mM paraquat   | 11.1±0.2 | 13 | -43%<br>(-21% <sup>WT ctrl</sup> ) | 102/120 | <0.0001<br>(<0.0001<br>WT 0.5 mM par)  | Fig. S4J     |
|                                        | 15.3±0.3 | 17 | -31%                               | 109/120 | <0.0001                                |              |

|                                       |          |    |                                    |         |                                     |                     |
|---------------------------------------|----------|----|------------------------------------|---------|-------------------------------------|---------------------|
|                                       |          |    | (-7% <sup>WT ctrl</sup> )          |         | (<0.0001<br>WT 0.5 mM par)          |                     |
| <i>vhl-1(ok161)</i><br>/1 mM paraquat | 8.0±0.1  | 11 | -59%<br>(-43% <sup>WT ctrl</sup> ) | 110/120 | <0.0001<br>(<0.0001<br>WT 1 mM par) | Fig.<br>S4K         |
|                                       | 11.7±0.3 | 15 | -47%<br>(-29% <sup>WT ctrl</sup> ) | 110/120 | <0.0001<br>(<0.0001<br>WT 1mM par)  |                     |
| <i>vhl-1(ok161)</i><br>/4 mM paraquat | 3.1±0.1  | 4  | -84%<br>(-78% <sup>WT ctrl</sup> ) | 60/90   | <0.0001<br>(<0.0001<br>WT 4mM par)  | Fig.<br>S4L         |
|                                       | 4.1±0.2  | 7  | -82%<br>(-75% <sup>WT ctrl</sup> ) | 73/90   | <0.0001<br>(<0.0001<br>WT 4mM par)  |                     |
| WT/control                            | 18.0±0.5 | 21 |                                    | 85/100  |                                     |                     |
|                                       | 16.7±0.5 | 21 |                                    | 79/100  |                                     | Fig.<br>S5M-<br>S5S |
| WT<br>/0.015 mM<br>paraquat           | 23.9±0.6 | 29 | +33%                               | 81/100  | <0.0001                             |                     |
|                                       | 21.1±0.7 | 27 | +26%                               | 83/100  | <0.0001                             | Fig.<br>S5M         |
| WT<br>/0.062 mM<br>paraquat           | 23.9±0.6 | 29 | +33%                               | 84/100  | <0.0001                             |                     |
|                                       | 22.9±0.7 | 27 | +37%                               | 79/100  | <0.0001                             | Fig.<br>S5N         |
| WT/0.25 mM<br>paraquat                | 25.8±0.8 | 31 | +43%                               | 82/100  | <0.0001                             |                     |
|                                       | 23.3±0.8 | 27 | +40%                               | 84/100  | <0.0001                             | Fig.<br>S5O         |
| WT/0.5 mM<br>paraquat                 | 23.9±0.8 | 27 | +33%                               | 86/100  | <0.0001                             |                     |
|                                       | 20.6±0.8 | 25 | +23%                               | 79/100  | <0.0001                             | Fig.<br>S5P         |
| WT/1 mM<br>paraquat                   | 19.3±0.5 | 23 | +7%                                | 94/100  | 0.0996                              |                     |
|                                       | 16.9±0.5 | 19 | +1%                                | 90/100  | 0.9850                              | Fig.<br>S5Q         |
| WT/2 mM<br>paraquat                   | 16.0±0.5 | 19 | -11%                               | 93/100  | 0.0027                              |                     |
|                                       | 14.6±0.4 | 17 | -13%                               | 91/100  | 0.0002                              | Fig.<br>S5R         |
| WT/4 mM                               | 10.5±0.5 | 14 | -42%                               | 47/90   | <0.0001                             |                     |

|                                                   |          |    |                                    |        |                                        |              |
|---------------------------------------------------|----------|----|------------------------------------|--------|----------------------------------------|--------------|
| paraquat                                          | 8.2±0.4  | 10 | -51%                               | 58/90  | <0.0001                                | Fig. S5S     |
| <i>hif-1(ia4); aak-2(ok524)/control</i>           | 15.0±0.6 | 17 | -17%                               | 42/108 | <0.0001                                |              |
|                                                   | 13.6±0.4 | 15 | -19%                               | 63/117 | <0.0001                                | Fig. S5M-S5S |
| <i>hif-1(ia4); aak-2(ok524)/0.015 mM paraquat</i> | 16.2±0.6 | 19 | +8%<br>(-10% <sup>WT ctrl</sup> )  | 48/108 | 0.1232<br>(<0.0001<br>WT 0.015 mM par) |              |
|                                                   | 13.3±0.4 | 15 | -2%<br>(-20% <sup>WT ctrl</sup> )  | 66/120 | 0.6512<br>(<0.0001<br>WT 0.015 mM par) | Fig. S5M     |
| <i>hif-1(ia4); aak-2(ok524)/0.062 mM paraquat</i> | 19.5±0.6 | 23 | +30%<br>(+8% <sup>WT ctrl</sup> )  | 49/108 | 0.0001<br>(<0.0001<br>WT 0.062 mM par) |              |
|                                                   | 15.4±0.5 | 17 | +13%<br>(-8% <sup>WT ctrl</sup> )  | 73/120 | 0.0033<br>(<0.0001<br>WT 0.062 mM par) | Fig. S5N     |
| <i>hif-1(ia4); aak-2(ok524)/0.25 mM paraquat</i>  | 19.5±0.7 | 23 | +30%<br>(+8% <sup>WT ctrl</sup> )  | 41/108 | 0.0001<br>(<0.0001<br>WT 0.25 mM par)  |              |
|                                                   | 15.2±0.5 | 19 | +12%<br>(-9% <sup>WT ctrl</sup> )  | 75/120 | 0.0044<br>(<0.0001<br>WT 0.25 mM par)  | Fig. S5O     |
| <i>hif-1(ia4); aak-2(ok524)/0.5 mM paraquat</i>   | 17.9±0.6 | 21 | +19%<br>(-1% <sup>WT ctrl</sup> )  | 58/108 | 0.0009<br>(<0.0001<br>WT 0.5 mM par)   |              |
|                                                   | 13.8±0.5 | 17 | +1%<br>(-17% <sup>WT ctrl</sup> )  | 72/100 | 0.3717<br>(<0.0001<br>WT 0.5 mM par)   | Fig. S5P     |
| <i>hif-1(ia4); aak-2(ok524)/1 mM paraquat</i>     | 18.7±0.6 | 23 | +25%<br>(+4% <sup>WT ctrl</sup> )  | 85/108 | 0.0001<br>(0.6715<br>WT 1 mM par)      |              |
|                                                   | 13.0±0.4 | 15 | -4%<br>(-22% <sup>WT ctrl</sup> )  | 64/84  | 0.5571<br>(<0.0001<br>WT 1 mM par)     | Fig. S5Q     |
| <i>hif-1(ia4); aak-2(ok524)/2 mM paraquat</i>     | 9.5±0.4  | 12 | -37%<br>(-47% <sup>WT ctrl</sup> ) | 81/108 | 0.0001<br>(<0.0001<br>WT 2 mM par)     |              |

|                                                   |          |    |                                    |         |                                             |                   |
|---------------------------------------------------|----------|----|------------------------------------|---------|---------------------------------------------|-------------------|
|                                                   | 7.6±0.4  | 11 | -44%<br>(-54% <sup>WT ctrl</sup> ) | 48/100  | 0.0001<br>(<0.0001 <sup>WT 2 mM par</sup> ) | Fig. S5R          |
| <i>hif-1(ia4); aak-2(ok524)</i> /4 mM paraquat    | 5.0±0.2  | 6  | -67%<br>(-72% <sup>WT ctrl</sup> ) | 26/90   | 0.0001<br>(<0.0001 <sup>WT 4 mM par</sup> ) |                   |
|                                                   | 4.6±0.2  | 6  | -66%<br>(-72% <sup>WT ctrl</sup> ) | 25/90   | 0.0001<br>(<0.0001 <sup>WT 4 mM par</sup> ) | Fig. S5S          |
| WT/control, without FUDR <sup>^</sup>             | 17.1±0.4 | 21 |                                    | 147/244 |                                             |                   |
| <sup>\$</sup>                                     | 14.2±0.4 | 17 |                                    | 59/125  |                                             |                   |
| <sup>*</sup>                                      | 20.2±0.4 | 24 |                                    | 108/175 |                                             | Fig. 1B, S4T, S4U |
|                                                   | 18.8±0.4 | 23 |                                    | 105/175 |                                             |                   |
| WT/0.25 mM paraquat, without FUDR <sup>^</sup>    | 21.1±0.4 | 25 | +23%                               | 118/180 | <0.0001                                     |                   |
| <sup>\$</sup>                                     | 23.1±0.6 | 27 | +63%                               | 105/180 | <0.0001                                     |                   |
| <sup>*</sup>                                      | 28.1±0.7 | 34 | +39%                               | 96/160  | <0.0001                                     | Fig. 1B, S4T, S4U |
|                                                   | 25.7±0.5 | 31 | +37%                               | 115/175 | <0.0001                                     |                   |
| <i>hif-1(ia4)</i> /control, without FUDR          | 19.3±0.5 | 23 | +13%                               | 83/125  | 0.0005                                      |                   |
|                                                   | 17.5±0.5 | 22 | +23%                               | 84/125  | <0.0001                                     |                   |
|                                                   | 19.9±0.5 | 24 | -1%                                | 91/140  | 0.391                                       | Fig. S4T          |
|                                                   | 21.2±0.5 | 23 | +13%                               | 79/175  | 0.0001                                      |                   |
| <i>hif-1(ia4)</i> /0.25 mM paraquat, without FUDR | 19.0±0.6 | 24 | -2%<br>(+11% <sup>WT ctrl</sup> )  | 81/130  | 0.893<br>(0.0568 <sup>WT par</sup> )        |                   |
|                                                   | 16.0±0.5 | 18 | -8%<br>(+13% <sup>WT ctrl</sup> )  | 78/150  | 0.0272<br>(<0.0001 <sup>WT par</sup> )      |                   |
|                                                   | 24.9±0.6 | 29 | 25%<br>(+23% <sup>WT ctrl</sup> )  | 92/140  | <0.0001<br>(0.0002 <sup>WT par</sup> )      | Fig. S4T          |
|                                                   | 23.6±0.5 | 27 | +11%<br>(+25% <sup>WT ctrl</sup> ) | 98/175  | 0.0004<br>(0.0013 <sup>WT par</sup> )       |                   |
| <i>hif-1(ia4); aak-2(ok524)</i>                   | 11.2±0.3 | 14 | -35%                               | 80/150  | <0.0001                                     |                   |

|                                                                          |          |    |                                    |         |                                         |             |
|--------------------------------------------------------------------------|----------|----|------------------------------------|---------|-----------------------------------------|-------------|
| /control,<br>without FUDR                                                | 11.1±0.4 | 13 | -22%                               | 53/146  | <0.0001                                 | Fig.<br>S4U |
|                                                                          | 13.6±0.3 | 17 | -33%                               | 85/200  | <0.0001                                 |             |
| <i>hif-1(ia4); aak-2(ok524)</i><br>/0.25 mM<br>paraquat,<br>without FUDR | 14.5±0.4 | 18 | +30%<br>(-15% <sup>WT ctrl</sup> ) | 118/180 | <0.0001<br>(<0.0001 <sup>WT par</sup> ) |             |
|                                                                          | 13.8±0.3 | 18 | +24%<br>(-3% <sup>WT ctrl</sup> )  | 118/162 | <0.0001<br>(<0.0001 <sup>WT par</sup> ) |             |
|                                                                          | 16.5±0.3 | 20 | +21%<br>(-18% <sup>WT ctrl</sup> ) | 146/244 | <0.0001<br>(<0.0001 <sup>WT par</sup> ) | Fig.<br>S4U |

Within this table, paraquat treatment was started from L4 stage throughout adulthood. For lifespan measurements without FUDR treatment, paraquat treatment was started from egg hatching.

Δ: % changes in lifespan were calculated against the same control data. Increased (+) or decreased (-) mean lifespan was indicated.

%<sup>WT ctrl</sup>: the % change in lifespan compared to wild-type control. The average of these percentage values was used for the “% change in lifespan” in **Figures 4A, 4E, or 4J**

p-values were calculated for mutants against wild type and for paraquat-treated mutants against the corresponding mutants under control condition. p-values in the parentheses were calculated against wild type treated with the indicated concentration of paraquat (par)

^, \$, \*: the lifespan data marked with these are also used in **Table S1**.

@: The lifespan data marked with these are also used in **Table S2**.

**Table S4. Lifespan analysis of *isp-1* and *isp-1; hif-1* mutants treated with RNAi targeting iron-homeostasis regulatory genes.**

| Strain/treatment                            | Mean lifespan $\pm$ SEM (days) | 75th percentile | % change <sup>Δ</sup> | Number of animals that died/total | p-value vs. control | Figure in text      |
|---------------------------------------------|--------------------------------|-----------------|-----------------------|-----------------------------------|---------------------|---------------------|
| WT /control RNAi                            | 22.7 $\pm$ 0.4                 | 25              |                       | 131/150                           |                     | Fig. 5C, 5E, 5G, 5H |
|                                             | 21.9 $\pm$ 0.4                 | 27              |                       | 137/150                           |                     |                     |
|                                             | 18.4 $\pm$ 0.4                 | 22              |                       | 127/150                           |                     |                     |
| WT / <i>smf-3</i> RNAi                      | 23.6 $\pm$ 0.4                 | 28              | +4%                   | 99/145                            | 0.0818              | Fig. 5G             |
|                                             | 21.3 $\pm$ 0.4                 | 24              | -2%                   | 132/150                           | 0.2967              |                     |
|                                             | 19.0 $\pm$ 0.4                 | 22              | +3%                   | 133/150                           | 0.6412              |                     |
| WT / <i>ftn-1/ftn-2</i> RNAi                | 24.8 $\pm$ 0.6                 | 29              | +10%                  | 124/150                           | <0.0001             | Fig. 5H             |
|                                             | 24.3 $\pm$ 0.5                 | 28              | +11%                  | 127/150                           | <0.0001             |                     |
|                                             | 19.4 $\pm$ 0.5                 | 22              | +6%                   | 104/121                           | 0.1249              |                     |
| <i>hif-1(ia4)</i> /control RNAi             | 23.4 $\pm$ 0.5                 | 28              | +3%                   | 93/121                            | 0.0833              | Fig. 5G, 5H         |
|                                             | 22.7 $\pm$ 0.5                 | 25              | +4%                   | 108/120                           | 0.0441              |                     |
|                                             | 20.2 $\pm$ 0.5                 | 24              | +10%                  | 120/150                           | 0.0069              |                     |
| <i>hif-1(ia4)</i> / <i>smf-3</i> RNAi       | 23.7 $\pm$ 0.5                 | 28              | +1%                   | 101/150                           | 0.7409              | Fig. 5G             |
|                                             | 22.1 $\pm$ 0.5                 | 25              | -6%                   | 115/120                           | 0.5484              |                     |
|                                             | 21.0 $\pm$ 0.5                 | 24              | -11%                  | 109/150                           | 0.3539              |                     |
| <i>hif-1(ia4)</i> / <i>ftn-1/ftn-2</i> RNAi | 24.3 $\pm$ 0.5                 | 28              | +4%                   | 119/150                           | 0.117               | Fig. 5H             |
|                                             | 23.4 $\pm$ 0.5                 | 28              | 0%                    | 111/125                           | 0.1785              |                     |
|                                             | 22.0 $\pm$ 0.5                 | 27              | -6%                   | 113/150                           | 0.013               |                     |
| <i>isp-1(qm150)</i> /control RNAi           | 30.2 $\pm$ 0.9                 | 38              | +33%                  | 113/150                           | <0.0001             | Fig. 5C, 5D, 5E, 5F |
|                                             | 26.6 $\pm$ 0.8                 | 34              | +22%                  | 120/150                           | <0.0001             |                     |
|                                             | 26.5 $\pm$ 0.8                 | 33              | +44%                  | 144/150                           | <0.0001             |                     |
| <i>isp-1(qm150)</i> / <i>smf-3</i> RNAi     | 24.2 $\pm$ 0.8                 | 30              | -20%                  | 114/120                           | <0.0001             | Fig. 5C             |
|                                             | 21.3 $\pm$ 0.6                 | 27              | -20%                  | 138/150                           | <0.0001             |                     |
|                                             | 22.0 $\pm$ 0.7                 | 29              | -17%                  | 142/151                           | <0.0001             |                     |
| <i>isp-1(qm150)</i>                         | 27.1 $\pm$ 0.8                 | 35              | -10%                  | 130/150                           | 0.0045              | Fig. 5E             |

|                                                             |          |    |      |         |         |             |
|-------------------------------------------------------------|----------|----|------|---------|---------|-------------|
| <i>/ftn-1/ftn-2</i> RNAi                                    | 23.6±0.7 | 30 | -11% | 139/150 | 0.0013  |             |
|                                                             | 24.0±0.7 | 31 | -9%  | 148/150 | 0.041   |             |
| <i>isp-1(qm150); hif-1(ia4)</i><br><i>/control</i> RNAi     | 20.9±0.6 | 24 | -31% | 141/151 | <0.0001 | Fig. 5D, 5F |
|                                                             | 20.8±0.6 | 26 | -22% | 151/153 | <0.0001 |             |
| <i>isp-1(qm150); hif-1(ia4)</i><br><i>/smf-3</i> RNAi       | 21.5±0.6 | 26 | -19% | 142/151 | <0.0001 | Fig. 5D     |
|                                                             | 19.6±0.6 | 24 | -6%  | 99/120  | 0.0842  |             |
| <i>isp-1(qm150); hif-1(ia4)</i><br><i>/ftn-1/ftn-2</i> RNAi | 19.5±0.6 | 23 | -6%  | 129/150 | 0.0595  | Fig. 5F     |
|                                                             | 21.3±0.6 | 28 | -1%  | 147/150 | 0.5485  |             |
| <i>isp-1(qm150); hif-1(ia4)</i><br><i>/ftn-1/ftn-2</i> RNAi | 27.3±1.0 | 35 | +31% | 84/90   | <0.0001 | Fig. 5F     |
|                                                             | 22.8±0.6 | 30 | +10% | 145/150 | 0.0185  |             |
|                                                             | 25.4±0.7 | 30 | +18% | 145/151 | <0.0001 |             |

Within this table, the lifespan data sets shaded in the same colors (white or grey) were done in parallel and statistical analysis (p-values) was done within the data set.

<sup>Δ</sup>: % change in lifespan was calculated against the same control data. Increased (+) or decreased (-) mean lifespan was indicated.

**Table S5. Analysis of lifespan and pathogen resistance of *isp-1* mutants.**

**A. Lifespan analysis of *isp-1* mutants or paraquat treated condition**

| Strain/treatment       | Mean lifespan ±SEM (days) | 75th percentile | % change <sup>Δ</sup> | Number of animals that died/total | p-value vs. control | Figure in text |
|------------------------|---------------------------|-----------------|-----------------------|-----------------------------------|---------------------|----------------|
| WT/live <i>E. coli</i> | 22.5±0.6                  | 26              |                       | 59/75                             |                     | Fig. 6D        |
|                        | 18.8±0.5                  | 22              |                       | 73/100                            |                     |                |
| WT/dead <i>E. coli</i> | 31.2±0.9                  | 35              | +39%                  | 43/50                             | <0.0001             | Fig. 6D        |
|                        | 32.2±1.0                  | 38              | +71%                  | 63/73                             | <0.0001             |                |
| <i>isp-1(qm150)</i>    | 35.4±0.9                  | 39              | +57%                  | 70/100                            | <0.0001             | Fig. 6D        |

|                                                 |          |    |                                    |         |                                         |         |
|-------------------------------------------------|----------|----|------------------------------------|---------|-----------------------------------------|---------|
| /live <i>E. coli</i>                            | 25.2±1.3 | 30 | +34%                               | 41/50   | <0.0001                                 |         |
| <i>isp-1(qm150)</i><br>/dead <i>E. coli</i>     | 35.0±1.2 | 41 | -1%                                | 60/100  | 0.4232                                  | Fig. 6D |
|                                                 | 22.6±1.4 | 32 | -10%                               | 49/100  | 0.3739                                  |         |
| WT/ <i>E. coli</i>                              | 22.3±0.7 | 27 |                                    | 82/100  |                                         | Fig. 6E |
|                                                 | 20.7±0.7 | 24 |                                    | 72/100  |                                         |         |
| WT/ <i>B. subtilis</i>                          | 28.2±1.0 | 36 | +26%                               | 54/75   | <0.0001                                 | Fig. 6E |
|                                                 | 26.8±0.8 | 34 | +29%                               | 65/101  | <0.0001                                 |         |
| <i>isp-1(qm150)</i><br>/ <i>E. coli</i>         | 31.8±1.4 | 41 | +43%                               | 74/80   | <0.0001                                 | Fig. 6E |
|                                                 | 25.5±1.0 | 34 | +23%                               | 85/100  | <0.0001                                 |         |
| <i>isp-1(qm150)</i><br>/ <i>B. subtilis</i>     | 33.1±1.2 | 41 | +4%                                | 80/80   | 0.7871                                  | Fig. 6E |
|                                                 | 30.2±1.0 | 38 | +18%                               | 86/100  | 0.0012                                  |         |
| WT/dead <i>E. coli</i>                          | 27.3±0.8 | 32 |                                    | 82/125  |                                         | Fig. 6F |
|                                                 | 28.9±0.8 | 30 |                                    | 99/125  |                                         |         |
| WT/dead <i>E. coli</i> ,<br>0.25 mM<br>paraquat | 21.8±0.7 | 25 | -20%                               | 45/75   | <0.0001                                 | Fig. 6F |
|                                                 | 20.9±0.5 | 23 | -28%                               | 84/104  | <0.0001                                 |         |
| WT/control                                      | 15.1±0.4 | 19 |                                    | 106/120 |                                         | Fig. 6G |
|                                                 | 14.3±0.3 | 17 |                                    | 104/121 |                                         |         |
| WT/0.25 mM<br>paraquat                          | 21.0±0.4 | 23 | +39%                               | 101/120 | <0.0001                                 | Fig. 6G |
|                                                 | 17.8±0.3 | 21 | +25%                               | 98/120  | <0.0001                                 |         |
| <i>pmk-1(km25)</i><br>/control                  | 16.8±0.5 | 21 | +12%                               | 106/120 | 0.0031                                  | Fig. 6G |
|                                                 | 16.4±0.5 | 21 | +15%                               | 107/120 | 0.0003                                  |         |
| <i>pmk-1(km25)</i><br>/0.25 mM<br>paraquat      | 27.3±0.6 | 31 | +62%<br>(+81% <sup>WT ctrl</sup> ) | 106/120 | <0.0001<br>(<0.0001 <sup>WT par</sup> ) | Fig. 6G |
|                                                 | 26.8±0.5 | 32 | +63%<br>(+87% <sup>WT ctrl</sup> ) | 94/120  | <0.0001<br>(<0.0001 <sup>WT par</sup> ) |         |

p-values and % changes for single mutants were calculated against the control immediately

above. p-values and % changes for mutants fed with specific bacteria were calculated against the mutant fed with control *E. coli*.

Δ: % changes in lifespan were calculated against the same control data. Increased (+) or



decreased (-) mean lifespan was indicated.

%<sup>WT ctrl.</sup>: the % change in lifespan compared to wild-type control.

**B. Pathogen resistance of *isp-1* mutants against *Pseudomonas aeruginosa* (PA14)**

| Strain/treatment                               | Mean lifespan ±SEM (hours) | 75th percentile | % change <sup>Δ</sup> | Number of animals that died/total | p-value vs. control                | Figure in text |
|------------------------------------------------|----------------------------|-----------------|-----------------------|-----------------------------------|------------------------------------|----------------|
| WT<br><i>/E. coli</i> to PA14                  | 66.3±1.2                   | 78.3            |                       | 102/133                           |                                    | Fig 6A         |
|                                                | 75.2±1.8                   | 89.3            |                       | 104/120                           |                                    |                |
|                                                | 70.6±1.5                   | 85.3            |                       | 121/150                           |                                    |                |
|                                                | 77.3±1.6                   | 70.1            |                       | 128/150                           |                                    |                |
|                                                | 65.7±2.1                   | 76.0            |                       | 51/75                             |                                    |                |
|                                                | 73.5±1.7                   | 83.6            |                       | 66/90                             |                                    |                |
| <sup>α</sup>                                   | 66.1±1.0                   | 79.2            |                       | 69/75                             |                                    | Fig 6A         |
| <sup>β</sup>                                   | 68.2±2.2                   | 77.2            |                       | 54/78                             |                                    |                |
| <i>isp-1(qm150)</i><br><i>/E. coli</i> to PA14 | 81.7±2.2                   | 96.5            | +23%                  | 131/140                           | <0.0001                            |                |
|                                                | 70.2±1.9                   | 90.7            | -7%                   | 109/120                           | 0.8256                             |                |
|                                                | 99.4±3.0                   | 122.0           | +41%                  | 136/151                           | <0.0001                            |                |
|                                                | 85.5±2.8                   | 83.6            | +11%                  | 133/150                           | 0.0702                             |                |
|                                                | 87.1±3.2                   | 100.0           | +33%                  | 68/75                             | <0.0001                            |                |
|                                                | 80.3±2.4                   | 97.4            | +9%                   | 74/90                             | 0.4845<br>(0.0420 <sup>50%</sup> ) |                |
| <sup>α</sup>                                   | 74.7±2.5                   | 78.9            | +13%                  | 70/75                             | 0.3788<br>(0.0012 <sup>50%</sup> ) |                |
| <sup>β</sup>                                   | 74.7±2.4                   | 81.3            | +9%                   | 61/62                             | 0.3618                             |                |
| WT<br><i>/E. coli</i> to PA14                  | 82.3±2.0                   | 96.7            |                       | 94/119                            |                                    | Fig. S5        |
|                                                | 97.9±2.1                   | 119.4           |                       | 97/120                            |                                    |                |
| WT<br><i>/B. subtilis</i> to PA14              | 70.0±1.3                   | 79              | -15%                  | 100/120                           | <0.0001                            | Fig. S5        |
|                                                | 80.3±2.0                   | 84.8            | -18%                  | 97/120                            | <0.0001                            |                |
| WT<br><i>/B. subtilis</i> to PA14              | 47.2±0.8                   | 55.8            |                       | 104/120                           |                                    | Fig. 6B        |
|                                                | 57.2±1.2                   | 60.5            |                       | 79/120                            |                                    |                |

|                                                        |               |       |       |         |         |         |
|--------------------------------------------------------|---------------|-------|-------|---------|---------|---------|
| <i>isp-1(qm150)</i><br>/ <i>B. subtilis</i> to<br>PA14 | 106.0<br>±2.0 | 125.6 | +125% | 115/120 | <0.0001 | Fig. 6B |
|                                                        | 111.7<br>±2.3 | 126.7 | +95%  | 126/141 | <0.0001 |         |

In this table, survival data sets shaded in the same color (white or grey) or marked as  $\alpha$  or  $\beta$  were performed in parallel.

p-values marked in the parentheses as 50% is the p-value at 50% survival point calculated by Fisher's exact test using OASIS (15).

### C. Pathogen resistance of *isp-1* mutants against *Enterococcus faecalis*.

| Strain/treatment                            | Mean lifespan<br>±SEM<br>(Days) | 75th percentile | % change <sup>Δ</sup> | Number of animals that died/total | p-value vs. control | Figure in text |
|---------------------------------------------|---------------------------------|-----------------|-----------------------|-----------------------------------|---------------------|----------------|
| WT/ <i>E. faecalis</i>                      | 4.6±0.2                         | 6               |                       | 62/80                             |                     | Fig. 6C        |
|                                             | 4.6±0.2                         | 6               |                       | 72/95                             |                     |                |
| <i>isp-1(qm150)</i><br>/ <i>E. faecalis</i> | 7.0±0.5                         | 10              | +52%                  | 64/80                             | 0.0001              | Fig. 6C        |
|                                             | 7.9±0.5                         | 11              | +72%                  | 74/100                            | <0.0001             |                |

**Table S6. Pathogen resistance of *isp-1* mutants on hyper-pathogenic *E. coli* food.**

| Strain/treatment                 | Mean lifespan<br>±SEM<br>(days) | 75th percentile | % change <sup>Δ</sup> | Number of animals that died/total | p-value vs. control | Figure in text |
|----------------------------------|---------------------------------|-----------------|-----------------------|-----------------------------------|---------------------|----------------|
| WT/BHI OP50                      | 7.3±0.4                         | 10              |                       | 51/60                             |                     | Fig 7A         |
|                                  | 5.7±0.3                         | 8               |                       | 49/60                             |                     |                |
|                                  | 7.2±0.3                         | 9               |                       | 54/60                             |                     | Fig. 7B,<br>7C |
|                                  | 6.3±0.2                         | 8               |                       | 47/60                             |                     |                |
| <i>isp-1(qm150)</i><br>/BHI OP50 | 10.8±0.5                        | 13              | +48%                  | 38/44                             | <0.0001             | Fig 7A         |
|                                  | 9.4±0.6                         | 13              | +65%                  | 59/60                             | <0.0001             |                |

|                                                           |          |    |                                              |        |                                                   |                |
|-----------------------------------------------------------|----------|----|----------------------------------------------|--------|---------------------------------------------------|----------------|
|                                                           | 10.4±0.4 | 13 | +44%                                         | 49/60  | <0.0001                                           |                |
|                                                           | 9.9±0.4  | 12 | +57%                                         | 42/60  | <0.0001                                           | Fig. 7B,<br>7C |
| <i>hif-1(ia4)</i><br>/BHI OP50                            | 6.4±0.4  | 9  | +12%                                         | 57/60  | 0.0774                                            |                |
|                                                           | 7.4±0.3  | 10 | +3%                                          | 56/60  | 0.6750                                            |                |
|                                                           | 7.4±0.2  | 9  | +17%                                         | 53/60  | 0.0007                                            | Fig. 7B        |
| <i>isp-1(qm150);</i><br><i>hif-1(ia4)</i><br>/BHI OP50    | 9.8±0.3  | 11 | +53%                                         | 38/60  | <0.0001<br>(0.1947 <sup><i>isp1</i></sup> )       |                |
|                                                           | 9.2±0.2  | 11 | +24%                                         | 59/60  | <0.0001<br>(<0.0001 <sup><i>isp1</i></sup> )      |                |
|                                                           | 7.8±0.3  | 9  | +5%                                          | 45/60  | 0.0257<br>(<0.0001 <sup><i>isp1</i></sup> )       | Fig. 7B        |
| <i>aak-2(ok524)</i><br>/BHI OP50                          | 7.7±0.3  | 9  | +35%                                         | 36/60  | 0.0001                                            |                |
|                                                           | 7.5±0.2  | 9  | +4%                                          | 52/60  | 0.9226                                            |                |
|                                                           | 7.6±0.2  | 9  | +21%                                         | 46/60  | <0.0001                                           | Fig. 7C        |
| <i>isp-1(qm150);</i><br><i>aak-2(ok524)</i><br>/BHI OP50  | 7.1±0.5  | 10 | -8%                                          | 51/60  | 0.7079<br>(<0.0001 <sup><i>isp1</i></sup> )       |                |
|                                                           | 8.7±0.2  | 10 | +16%                                         | 54/60  | <0.0001<br>(<0.0001 <sup><i>isp1</i></sup> )      |                |
|                                                           | 8.9±0.2  | 10 | +17%                                         | 40/60  | <0.0001<br>(0.0019 <sup><i>isp1</i></sup> )       | Fig. 7C        |
| WT/control RNAi<br>to BHI OP50                            | 7.5±0.2  | 9  |                                              | 76/90  |                                                   | Fig.<br>7D, 7F |
|                                                           | 6.9±0.2  | 9  |                                              | 79/90  |                                                   | Fig. 7E        |
| <i>isp-1(qm150)</i><br>/control RNAi to<br>BHI OP50       | 9.1±0.4  | 14 | +23%                                         | 92/105 | 0.0001                                            | Fig.<br>7D, 7F |
|                                                           | 8.7±0.4  | 12 | +26%                                         | 79/105 | <0.0001                                           | Fig. 7E        |
| WT/ <i>dve-1</i> RNAi<br>to BHI OP50                      | 3.5±0.2  | 4  | -53%                                         | 76/90  | <0.0001                                           | Fig. 7D        |
|                                                           | 3.4±0.2  | 5  | -51%                                         | 95/90  | <0.0001                                           |                |
| <i>isp-1(qm150)</i><br>/ <i>dve-1</i> RNAi to<br>BHI OP50 | 7.1±0.2  | 9  | +101%<br>(-22% <sup><i>isp1/ctrl</i></sup> ) | 89/105 | <0.0001<br>(<0.0001 <sup><i>isp1/ctrl</i></sup> ) | Fig. 7D        |
|                                                           | 6.2±0.2  | 8  | +83%<br>(-32% <sup><i>isp1/ctrl</i></sup> )  | 81/105 | <0.0001<br>(<0.0001 <sup><i>isp1/ctrl</i></sup> ) |                |
| WT/ <i>ubl-5</i> RNAi<br>to BHI OP50                      | 7.1±0.3  | 9  | -5%                                          | 66/90  | 0.6379                                            |                |
|                                                           | 6.0±0.3  | 9  | -12%                                         | 98/90  | 0.1254                                            | Fig. 7E        |

|                                                            |          |    |                                  |        |                                       |         |
|------------------------------------------------------------|----------|----|----------------------------------|--------|---------------------------------------|---------|
| <i>isp-1(qm150)</i><br>/ <i>ubl-5</i> RNAi to<br>BHI OP50  | 10.0±0.5 | 14 | +42%<br>(+10% <i>isp1</i> /ctrl) | 93/105 | <0.0001<br>(0.1331 <i>isp1</i> /ctrl) |         |
|                                                            | 9.6±0.4  | 13 | +60%<br>(+5% <i>isp1</i> /ctrl)  | 99/105 | <0.0001<br>(0.0601 <i>isp1</i> /ctrl) | Fig. 7E |
| WT/ <i>ceh-23</i> RNAi<br>to BHI OP50                      | 7.4±0.2  | 9  | -1%                              | 71/90  | 0.6739                                | Fig. 7F |
|                                                            | 6.6±0.2  | 9  | -3%                              | 78/90  | 0.8581                                |         |
| <i>isp-1(qm150)</i><br>/ <i>ceh-23</i> RNAi to<br>BHI OP50 | 8.3±0.5  | 12 | +12%<br>(-9% <i>isp1</i> /ctrl)  | 66/70  | 0.0207<br>(0.3811 <i>isp1</i> /ctrl)  | Fig. 7F |
|                                                            | 7.6±0.5  | 12 | +14%<br>(-17% <i>isp1</i> /ctrl) | 74/105 | 0.0013<br>(0.0984 <i>isp1</i> /ctrl)  |         |
| WT/ <i>daf-16</i> RNAi<br>to BHI OP50                      | 7.1±0.2  | 9  |                                  | 54/60  |                                       |         |
|                                                            | 5.9±0.2  | 8  |                                  | 43/60  |                                       |         |
|                                                            | 5.5±0.3  | 7  |                                  | 41/60  |                                       | Fig. S6 |
|                                                            | 5.4±0.2  | 7  |                                  | 69/80  |                                       |         |
| <i>hif-1(ia4)</i><br>/ <i>daf-16</i> RNAi to<br>BHI OP50   | 7.7±0.3  | 9  | +8%                              | 58/62  | 0.0017                                |         |
|                                                            | 5.9±0.2  | 7  | 0%                               | 45/60  | 0.8066                                |         |
|                                                            | 5.1±0.3  | 7  | -7%                              | 44/60  | 0.6407                                | Fig. S6 |
|                                                            | 4.9±0.2  | 6  | -9%                              | 70/80  | 0.1003                                |         |

p-values were calculated for single mutants against wild type and for double mutants against the single mutants immediately above.

BHI OP50: hyper-pathogenic OP50 *E. coli* bacteria by culturing in BHI media

p-values in the parentheses were calculated against *isp-1* mutants (*isp1*) or *isp-1* mutants treated with control RNAi (*isp1*/ctrl).

**Dataset S1. Analysis of list of genes that were differently regulated in *isp-1* and *isp-1*; *hif-1* (q<0.05).** Detailed gene lists obtained by comparing with previous microarray data and Mountain analysis (please see the separate spreadsheet file).

## SI Materials and Methods

**Strains.** The following strains were analyzed in this study: N2 wild type, CF2725 *aak-2(ok524)* X, CF2354 *clk-1(qm30)* III, CF2172 *isp-1(qm150)* IV, CF2479 *daf-12(rh61rh411)* X, CF2495 *hsf-1(sy441)* I, CF2732 *sir-2.1(ok434)* IV, IJ6 *hif-1(ia4)* V, IJ7 *vhl-1(ok161)* X, IJ110 *clk-1(qm30)* III; *iaIs28[P-hif-1::hif-1a::tag + unc-119(+)]*, IJ117 *isp-1(qm150)* IV; *iaIs28[P-hif-1::hif-1a::tag + unc-119(+)]*, IJ113 *aak-2(rr48)* X, IJ130 *pmk-1(km25)* IV, IJ138 *hif-1(ia4)* V; *aak-2(ok524)* X, IJ153 *aak-2(ok524)* X; *iaIs28[P-hif-1::hif-1a::tag + unc-119(+)]*, IJ159 *iaIs28[P-hif-1::hif-1a::tag + unc-119(+)]*, IJ167 *vhl-1(ok161)* X; *iaIs28[P-hif-1::hif-1a::tag + unc-119(+)]*, IJ 259 *isp-1(qm150)* IV; *aak-2(ok524)* X, IJ333 *isp-1(qm150)* IV; *hif-1(ia4)* V, IJ339 *par-4(tm2986)* V, IJ372 *aakb-2(rr88)* III, EU1 *skn-1(zu67)* IV/nT1[*unc-?(n754) let-?*], WBM59 *uthIs272[Pmyo-2::tdTOMATO, unc-54 3'UTR]*, WBM60 *uthIs248[Paak-2::aak-2 genomic (aal-321)::GFP ::unc-54 3'UTR, Pmyo-2::tdTOMATO]*, IJ599 WBM59 outcrossed 4 times with Lee lab N2, IJ600 WBM60 outcrossed 4 times with Lee lab N2

**Paraquat treatment.** Paraquat stock solution was added onto OP50 *E. coli*-seeded plates directly to achieve a desired concentration. Gravid day 1 adult animals were transferred onto the paraquat-treated plates and removed after 16 hours for synchronization, and the progeny were used for experiments. Because worms arrest as early larvae under high concentrations (1 or 4 mM) of paraquat, L4 stage animals were transferred onto these high concentrations of paraquat-treated plates.

**Lifespan analysis.** Lifespan assays were performed as described previously (12). Synchronized worms were grown on NGM plates seeded with *E. coli* with or without adding 0.25 mM paraquat at 20°C until they reached adulthood. Pre-fertile day 1 adults were transferred onto new *E. coli*-

seeded NGM plates treated with 5  $\mu$ M 5-fluoro-2'-deoxyuridine (FUdR, Sigma St Louis, MO, USA). For the lifespan under various concentrations of paraquat-treated conditions, L4 animals were transferred onto *E. coli*-seeded NGM plates treated with paraquat (0.015, 0.062, 0.25, 0.5, 1, 2, and 4 mM) and FUdR. To prepare plates seeded with dead *E. coli*, streptomycin-resistant overnight cultured OP50 bacteria were pelleted, resuspended, and concentrated (50X) with M9 buffer. Ten  $\mu$ g/ml streptomycin or kanamycin was added to the resuspended *E. coli* and empty NGM plates for preparing live or dead bacteria, respectively. The resuspended *E. coli* solution was seeded on NGM plates and dried overnight and treated with FUdR. For the lifespan assay without FUdR, adult animals were transferred to freshly prepared plates for every other day until the worms produced no progeny. *Bacillus subtilis* (CU1065) was cultured in liquid LB media for 8 hours in a shaking incubator at 37°C, seeded on NGM plates, and cultured at 37°C for another 12 hours. Worms were synchronized by bleaching gravid adults using hypochloride solution and the collected eggs were transferred to *B. subtilis*-seeded plates in order to prevent *E. coli* contamination. Note that *B. subtilis* seeded on NG (nematode growth) media quickly form metabolically dormant spores (16). Thus, under our experimental conditions, it is unlikely that the metabolites of *B. subtilis* affected lifespan results, as shown in a previous study (16). Worms were scored as live or dead for every two or three days until all the worms were dead. Animals that were ruptured, displayed internal progeny hatching, burrowed or crawled off the plates were censored as described previously (12).

**RNA interference.** *E. coli* feeding RNAi clones targeting *smf-3*, *ceh-23*, and *dve-1* were cultured from the Ahringer *C. elegans* RNAi library. *ftn-1* and *ftn-2* RNAi clones were from the *C. elegans* ORFeome RNAi library. Empty vector (L4440) was used as a control. Genomic DNA of

*ubl-5* (898 bp) was cloned into L4440 vector and transformed into HT115 *E. coli*. Each RNAi clone was cultured overnight in LB broth containing 50 µg/ml ampicillin (USB, Santa Clara, CA, USA). For *ftn-1/ftn-2* (mixed in equal volume) and *smf-3* RNAi, the optical density at 590 nm values of overnight cultured *E. coli* were adjusted to 0.9 (17). RNAi bacteria were spotted on NGM plates containing ampicillin (50 µg/ml), and cultured overnight at 37°C. To induce double-stranded RNAs, 1 mM isopropyl β-D-1-thiogalactopyranoside (IPTG, GOLDBIO, St. Louis, MO, USA) was added on the plates before usage.

**Western blot analysis.** Synchronized worms that reached mid-L4 stage were used to measure phosphorylated AAK-2 in **Figures 1G** and **2G**. Synchronized L4 to young adult worms were used to detect HIF-1::myc levels in **Figures 2A** and **2C**. In **Figure S2D**, L4 to young adult worms cultured on control RNAi plates were harvested, transferred, and cultured on control or *daf-15* RNAi-seeded plates treated with FUDR for 3 days and harvested. To obtain sufficient amount of worm samples, we used mixed staged worms (mostly late larvae and young adults) for *clk-1* and *isp-1* mutants, and wild-type animals in **Figures 1H** and **2B**. Animals were harvested and washed twice by using M9 buffer, and subsequently centrifugated at 5,000 rpm briefly. The worm pellets were immediately frozen using liquid nitrogen, mixed with SDS sample loading buffer (2X), and boiled for 10 minutes. Worms were further broken by vortexing for 10 minutes, and then centrifuged for 30 minutes at 13,000 rpm to eliminate insoluble debris. The worm lysates were electrophoresed using 8% SDS-PAGE and transferred to PVDF membrane. The PVDF membrane was blocked with 5% skim milk or 5% BSA in PBS-T (0.1% Tween 20) or TBS-T(0.1% Tween 20), and subsequently incubated with primary antibodies against c-myc (#sc-40 Santa Cruz, Santa Cruz, California, USA 1:1000) or phospho-AMPKα (#4188 Cell

Signaling Beverly, MA, USA 1:2000). Anti-mouse (1:10,000) or anti-rabbit (1:15,000) secondary antibodies conjugated with horseradish peroxidase were used for anti c-myc or anti phospho-AMPK $\alpha$  primary antibodies, respectively. The PVDF membrane was incubated in the chemoluminescent horseradish peroxidase substrate (Thermo Rockford, IL, USA) for 1 minute, and the signal was detected by using X-ray film (Agfa).

**GST-HIF-1 fusion protein purification.** HIF-1N (aa 1-365) and HIF-1C (aa 359-719) terminal protein regions were cloned into pET-49b(+) and transformed into BL21\* competent cells (Invitrogen). Site-directed mutagenesis to generate S419A and S551A mutant clones was performed by following the Site-Directed Mutagenesis manual (Stratagene). For the recombinant protein induction, 0.7 mM IPTG was added to the LB broth. GST-HIF-1C was induced at 37°C for 3 hours, whereas GST-HIF-1N was induced at 18°C for 24 hours because of insolubility at 37°C. Harvested *E. coli* were resuspended in lysis buffer (50 mM Tris-HCl pH 7.4, 150 mM NaCl, 1% Triton X-100, 1 mM DTT, 1 mM PMSF, 0.1  $\mu$ M aprotinin, 1 mM benzamidine, and 1  $\mu$ g/ml leupeptin), sonicated, and centrifuged at 13,000 rpm, 4°C for 20 minutes. The protein supernatant was incubated with Glutathione Sepharose 4B (GE healthcare) for 3 hours at 4°C. Protein bound Glutathione Sepharose was washed with lysis buffer for 8 times to reduce non-specifically bound proteins.

***In vitro* AMPK kinase assay.** *In vitro* AMPK kinase assay was performed as previously reported with some modifications (18). Purified recombinant human AMPK (171539, Merck Millipore, Billerica, MA) was prepared according to the manufacture's instruction. In total of 25  $\mu$ l reaction volume, resin bound substrates (1~2  $\mu$ g) were incubated with 2  $\mu$ l of AMPK, 5  $\mu$ l of kinase reaction buffer (25 mM MOPS, 25 mM MgCl<sub>2</sub>, 12.5  $\beta$ -glycerophosphate, 5 mM EGTA, 2 mM



EDTA pH 7.2, 0.25 mM DTT), 5  $\mu$ l of final 125  $\mu$ M ATP, 2  $\mu$ Ci radiolabeled ATP with or without 5  $\mu$ l of final 150  $\mu$ M AMP at 30°C for 10 minutes. SDS sample loading buffer (5X) was added to terminate the reaction, and the samples were boiled at 95°C for 10 minutes. Each sample was loaded on an 8% SDS-page gel, stained with Coomassie brilliant blue, and heat dried.  $^{32}$ P signals were detected by a phosphorimager (Fuji Film FLA-2000). To identify HIF-1 phosphorylation residues, phosphorylated GST-HIF-1C was excised from the gel for in-gel digestion and analysed by LC-MS/MS.

**In-gel digestion.** In-gel digestion and LC-MS/MS analysis were done following the steps described previously (19). The gel band was cut into approximately 1 mm cubes, and washed with distilled water. Subsequently the gel pieces were destained using 25 mM  $\text{NH}_4\text{HCO}_3$  in 50%  $\text{CH}_3\text{CN}$ , dehydrated with 100%  $\text{CH}_3\text{CN}$  and dried in air at room temperature (25°C). The dried gel pieces were reduced with 10 mM dithiothreitol (DTT) at 56°C for 1 hour followed by alkylated with 55 mM iodoacetamide for 1 hour in the dark at room temperature (25°C). Washing with 25 mM  $\text{NH}_4\text{HCO}_3$  in 50%  $\text{CH}_3\text{CN}$ , the gel pieces were again dehydrated with 100%  $\text{CH}_3\text{CN}$  and dried in air at room temperature (25°C). For trypsin digestion, pre-cooled dry gel pieces were rehydrated with 12.5 ng/ $\mu$ l trypsin (in 25 mM  $\text{NH}_4\text{HCO}_3$ ) on ice for 30–45 minutes. Excess trypsin was washed with 25 mM  $\text{NH}_4\text{HCO}_3$ , and digestion was carried out overnight at 37°C. Digests were extracted once with 25 mM  $\text{NH}_4\text{HCO}_3$  in 50%  $\text{CH}_3\text{CN}$ , once with 0.2% trifluoroacetic acid (TFA) in 50%  $\text{CH}_3\text{CN}$ , and finally once with 0.2% TFA in 70%  $\text{CH}_3\text{CN}$ . The eluted sample was dried completely under vacuum, and stored at -20°C until use.

**LC-MS/MS analysis.** Peptide samples were reconstituted with 0.4% acetic acid and was injected from a cooled (10°C) auto sampler into a reversed-phase Magic C18aq (Michrom BioResources,

Auburn, CA) column (15 cm×75 μm, packed in-house) on an Eksigent nanoLC-ultra 1D plus system at a flow rate of 300 nL/min. Prior to use, the column was equilibrated with 95% buffer A (0.1% formic acid in H<sub>2</sub>O) and 5% buffer B (0.1% formic acid in acetonitrile). The peptides were eluted with a linear gradient from 5% to 30% buffer B over 30 minutes and 30% to 50% buffer B over 8 minutes followed by an organic wash and aqueous re-equilibration at a flow rate of 300 nL/min with a total run time of 75 minutes. The HPLC system was coupled to a Q Exactive quadrupole mass spectrometer (Thermo Scientific, Bremen, Germany) operated in the data-dependent mode. Survey full-scan MS spectra (m/z 300–2000) were acquired with a resolution of 75000. Source ionization parameters were as follows: spray voltage, 1.9 kV; capillary temperature, 275°C; and s-lens level, 44.0. The MS/MS spectra of the 12 most intense ions from the MS1 scan with a charge state ≥2 were acquired with the following options: resolution, 17500; isolation width, 2.0 m/z; normalized collision energy, 27%; dynamic exclusion duration, 30 s; and ion selection threshold, 4.00E+03 counts.

**Database search and data process.** The raw data were searched using Sequest algorithm in Proteome Discoverer 1.4 (Thermo Scientific Inc., San Jose, CA). The method outline used in the spectrum selector node of the Proteome Discoverer software included the following scan event filters: fragmentation method, ionization source, and Unrecognized Activation Type Replacements parameters and all were set to default settings to generate MS/MS spectra. Retention time, precursor charge state (high/low), total intensity threshold value, minimum peak count was set to default settings. The Min and Max precursor mass settings were 350 and 5000 Da, respectively. The database search included *C. elegans* HIF-1 C terminus GST protein and the common contaminants. The search parameters included in this study were: full tryptic peptide

cleavage specificity, two missed cleavages, fixed modification of carbamidomethyl cysteine (+57.021 Da), and variable modifications of oxidized methionine (+15.995 Da), phosphorylated Ser, Thr, and Tyr (+79.9799). The Sequest algorithm parameters were: Dta generation threshold =10000, precursor ion mass tolerance =15 ppm, fragment ion mass tolerance for ion trap MS/MS was 0.05 Da. The criteria used for acceptance of peptide assignments are as follows: Minimal XCorr value for each charged state ranging from 1 to 7 was 1.50, 2.0, 2.25, 2.75, 3.0, 3.2, and 3.4 respectively. A strict FDR of 0.01 and a relaxed FDR of 0.05, a total of two target values, for a decoy database search were applied.

**Quantitative-RT PCR.** Quantitative-RT PCR experiments were performed as described previously (12). Synchronized L4 (**Figure 2**) or day 1 young adult worms (**Figure 5**) were used for RNA extraction. RNA was isolated using RNAiso plus (#9109, TaKaRa, Seta, Kyoto, Japan) and reverse transcribed to cDNA using ImProm-II™ Reverse Transcriptase (Promega).

Quantitative real time PCR was performed using Step One Real time PCR system (Applied Biosystem) and analyzed using  $\Delta\Delta$ Ct methods described in the manufacturer's manual. The level of *ama-1* mRNA was used for normalization.

**Sequences of primers used for quantitative RT-PCR analysis.** *ama-1*-Forward:

TGGA ACTCTGGAGTCACACC, Reverse: CATCCTCCTTCATTGAACGG; *hif-1*-Forward:

CAGTGATTCTTCAATTCTTTACGTC, Reverse: CTGTTAAATCTGTCTGTGTTAATCC; *aak-*

*2*-Forward: CGTGGA ACTAGAACGTCAAG; *aak-2*-Reverse: GTCACATCGCACGACATGTC;

*ftn-1*-Forward: GTCAATAAACAGATTAACGTAGAAC, *ftn-1*-Reverse:

CGAAGTGCGATATCATCACGATCG; *smf-3*-Forward: GCTGTAGTGATCTTCTCCGGC; *smf-*

*3*-Reverse: GAAGTTGAATCAGCTGCAAGC

**Measurement of overall ROS levels by using 2',7'-dichlorofluorescein diacetate (DCF-DA).**

To measure the overall ROS levels, a DCF-DA (Molecular Probes, Carlsbad, CA, USA) assay was used as described previously (12). Briefly, approximately 1000 day 1 young adult worms were collected in M9 buffer and washed three times to eliminate bacteria. For experiments that include paraquat feeding, animals were harvested and fed with fresh *E. coli* for 30 minutes to eliminate ROS produced from paraquat-treated residual *E. coli*. At a high concentration of paraquat (4 mM) a majority of animals died during sample collection, and therefore we were not able to collect sufficient live worms to perform the assay.

**Measurement of hydrogen peroxide levels by using Amplex Red assay.** Amplex Red assay was performed as describe previously (20) with some modifications. For 0.25 mM paraquat-treated conditions, harvested worms were washed and fed with fresh *E. coli* for 30 minutes to eliminate the hydrogen peroxide production from residual *E. coli* treated with paraquat.

Approximately 200~300 day 1 young adults were collected and washed twice with M9 buffer to eliminate bacteria and washed once with 50 mM sodium phosphate (pH 7.4). Fifty  $\mu$ l of the buffer with live worms or standard hydrogen peroxide solutions (2.5  $\mu$ M to 40  $\mu$ M) were mixed with 50  $\mu$ L of Amplex Red working solution (100  $\mu$ M Amplex® Red reagent with 0.2 U/mL HRP) and incubated for 3 hours at 20°C. After incubation, the worms were settled down to collect 50  $\mu$ l of the supernatant, which was used for measuring hydrogen peroxide by applying to a plate reader (ELx800 Absorbance Microplate Reader) at 570 nm. Residual 50  $\mu$ l of the worm-containing solution was used for the normalization of samples by quantifying tubulin protein levels employing Western blot.

**Microarray sample preparation.** *isp-1(qm150)* and *isp-1(qm150); hif-1(ia4)* animals were

grown on NGM plates with live OP50 bacteria. Worms were harvested when the majority of the population reached mid-L4 stage. Total RNA was isolated using Tri-reagent (Molecular Research Center, Inc.) and purified with the RNeasy kit (Qiagen). cRNA synthesis/ amplification and Cy3/Cy5 dye labeling, and hybridization onto Agilent 4X44K *C. elegans* oligonucleotide microarrays(v2) were performed as previously described (21). One out of the three arrays was dye-flip replicate.

**Microarray data analysis.** Microarray raw data were normalized using Agilent feature extraction software. The normalized data were uploaded onto to the Princeton University MicroArray database (PUMA [<http://puma.princeton.edu>]). The raw data were retrieved by SUID (Sequence Unique Identifier) then averaged by Wormbase ID. Log2-transformed fold change was acquired after filtering out genes with <80% good data. For statistical analysis, the set of genes that were consistently up- or down-regulated from all three replicated microarray data set were extracted by using the Python programming language and R package. The p-values were estimated using Student's *t*-test. The q-values represent the probability of seeing the observed number of genes that would be significant in all replicated microarray data sets (22, 23). The q-values for each test to correct the multiple testing errors were calculated by using the R package (24) and the cutoff used in this analysis was  $q < 0.05$  (after Bonferroni correction).

**Pathogen resistance analysis.** Pathogen resistance against PA14 was measured as described previously (25). Briefly, high peptone (0.35%) NGM plates were prepared by seeding 5  $\mu$ l overnight culture of PA14. Worms were synchronized and grown until L4 or young adults on OP50-seeded NGM plates at 20°C. These L4 or young adult worms were transferred onto PA14 plates treated with 5  $\mu$ M FUDR and kept in a 25°C incubator. Animals were examined for every

6~12 hours and scored as alive if they moved when prodded. Resistance assay against *E. faecalis* was performed as previously described without FUDR treatment, since FUDR treatment reduced the pathogenicity of *E. faecalis* (26). Survival analysis on pathogenic *E. coli* was performed as previously described (26). Briefly, a single colony of OP50 was cultured in brain heart infusion (BHI) media and incubated for 3~4 hours at 37°C, spotted on solid (2% agar) BHI plates, and incubated overnight at 37°C. Plates were examined at ~24 hour interval for *E. faecalis* and BHI medium-cultured OP50 to examine the survival of animals. For RNAi experiment, *E. coli* expressing *dve-1*, *ubl-5* or *ceh-23* double stranded RNA (dsRNA) was cultured, spotted on NG plates containing ampicillin, and incubated overnight at 37°C. IPTG (1 mM) was added for the induction of dsRNA and L4 or young adult animals grown on these plates were transferred to BHI medium-cultured OP50 plates to examine the survival. The survival data were analyzed by using OASIS (online application for the survival analysis of lifespan assays <http://sbi.postech.ac.kr/oasis/surv/>) (15).

## Supporting References

1. Yang W & Hekimi S (2010) A mitochondrial superoxide signal triggers increased longevity in *Caenorhabditis elegans*. *PLoS Biol* 8(12):e1000556.
2. Shackelford DB & Shaw RJ (2009) The LKB1-AMPK pathway: metabolism and growth control in tumour suppression. *Nature reviews. Cancer* 9(8):563-575.
3. Shackelford DB, *et al.* (2009) mTOR and HIF-1 $\alpha$ -mediated tumor metabolism in an LKB1 mouse model of Peutz-Jeghers syndrome. *Proceedings of the National Academy of Sciences of the United States of America* 106(27):11137-11142.

4. Shen C, Nettleton D, Jiang M, Kim SK, & Powell-Coffman JA (2005) Roles of the HIF-1 hypoxia-inducible factor during hypoxia response in *Caenorhabditis elegans*. *The Journal of biological chemistry* 280(21):20580-20588.
5. Bishop T, *et al.* (2004) Genetic analysis of pathways regulated by the von Hippel-Lindau tumor suppressor in *Caenorhabditis elegans*. *PLoS Biol* 2(10):e289.
6. Curtis R, O'Connor G, & DiStefano PS (2006) Aging networks in *Caenorhabditis elegans*: AMP-activated protein kinase (*aak-2*) links multiple aging and metabolism pathways. *Aging cell* 5(2):119-126.
7. Xie M & Roy R (2012) Increased levels of hydrogen peroxide induce a HIF-1-dependent modification of lipid metabolism in AMPK compromised *C. elegans* dauer larvae. *Cell metabolism* 16(3):322-335.
8. Zarse K, *et al.* (2012) Impaired insulin/IGF1 signaling extends life span by promoting mitochondrial L-proline catabolism to induce a transient ROS signal. *Cell metabolism* 15(4):451-465.
9. Honda Y & Honda S (1999) The *daf-2* gene network for longevity regulates oxidative stress resistance and Mn-superoxide dismutase gene expression in *Caenorhabditis elegans*. *FASEB journal : official publication of the Federation of American Societies for Experimental Biology* 13(11):1385-1393.
10. McElwee J, Bubb K, & Thomas JH (2003) Transcriptional outputs of the *Caenorhabditis elegans* forkhead protein DAF-16. *Aging cell* 2(6):111-121.
11. Murphy CT, *et al.* (2003) Genes that act downstream of DAF-16 to influence the lifespan of *Caenorhabditis elegans*. *Nature* 424(6946):277-283.
12. Lee SJ, Hwang AB, & Kenyon C (2010) Inhibition of respiration extends *C. elegans* life

- span via reactive oxygen species that increase HIF-1 activity. *Curr Biol* 20(23):2131-2136.
13. Apfeld J, O'Connor G, McDonagh T, DiStefano PS, & Curtis R (2004) The AMP-activated protein kinase AAK-2 links energy levels and insulin-like signals to lifespan in *C. elegans*. *Genes Dev* 18(24):3004-3009.
  14. Leiser SF, Begun A, & Kaeberlein M (2011) HIF-1 modulates longevity and healthspan in a temperature-dependent manner. *Aging cell* 10(2):318-326.
  15. Yang JS, *et al.* (2011) OASIS: online application for the survival analysis of lifespan assays performed in aging research. *PLoS One* 6(8):e23525.
  16. Gusarov I, *et al.* (2013) Bacterial nitric oxide extends the lifespan of *C. elegans*. *Cell* 152(4):818-830.
  17. Rea SL, Ventura N, & Johnson TE (2007) Relationship between mitochondrial electron transport chain dysfunction, development, and life extension in *Caenorhabditis elegans*. *PLoS Biol* 5(10):e259.
  18. Mair W, *et al.* (2011) Lifespan extension induced by AMPK and calcineurin is mediated by CRTCL-1 and CREB. *Nature* 470(7334):404-408.
  19. Kabir MH, Suh EJ, & Lee C (2012) Comparative phosphoproteome analysis reveals more ERK activation in MDA-MB-231 than in MCF-7. *Int J Mass Spectrom* 309:1-12.
  20. Chavez V, Mohri-Shiomi A, Maadani A, Vega LA, & Garsin DA (2007) Oxidative stress enzymes are required for DAF-16-mediated immunity due to generation of reactive oxygen species by *Caenorhabditis elegans*. *Genetics* 176(3):1567-1577.
  21. Shaw WM, Luo S, Landis J, Ashraf J, & Murphy CT (2007) The *C. elegans* TGF-beta Dauer pathway regulates longevity via insulin signaling. *Curr Biol* 17(19):1635-1645.



22. Jung K, Friede T, & Beissbarth T (2011) Reporting FDR analogous confidence intervals for the log fold change of differentially expressed genes. *Bmc Bioinformatics* 12.
23. McCarthy DJ & Smyth GK (2009) Testing significance relative to a fold-change threshold is a TREAT. *Bioinformatics* 25(6):765-771.
24. Storey JD & Tibshirani R (2003) Statistical significance for genomewide studies. *Proceedings of the National Academy of Sciences of the United States of America* 100(16):9440-9445.
25. Tan MW, Mahajan-Miklos S, & Ausubel FM (1999) Killing of *Caenorhabditis elegans* by *Pseudomonas aeruginosa* used to model mammalian bacterial pathogenesis. *Proceedings of the National Academy of Sciences of the United States of America* 96(2):715-720.
26. Garsin DA, *et al.* (2001) A simple model host for identifying Gram-positive virulence factors. *Proceedings of the National Academy of Sciences of the United States of America* 98(19):10892-10897.
